# Supplementary material for: Centrifuge-free separation of plasma from milliliters of whole blood for point-of-care diagnostics
Source: Royal Society of Chemistry journal article supplement (doi:10.1039/d6lc00135a), 2026-04-20

Vertical chamber

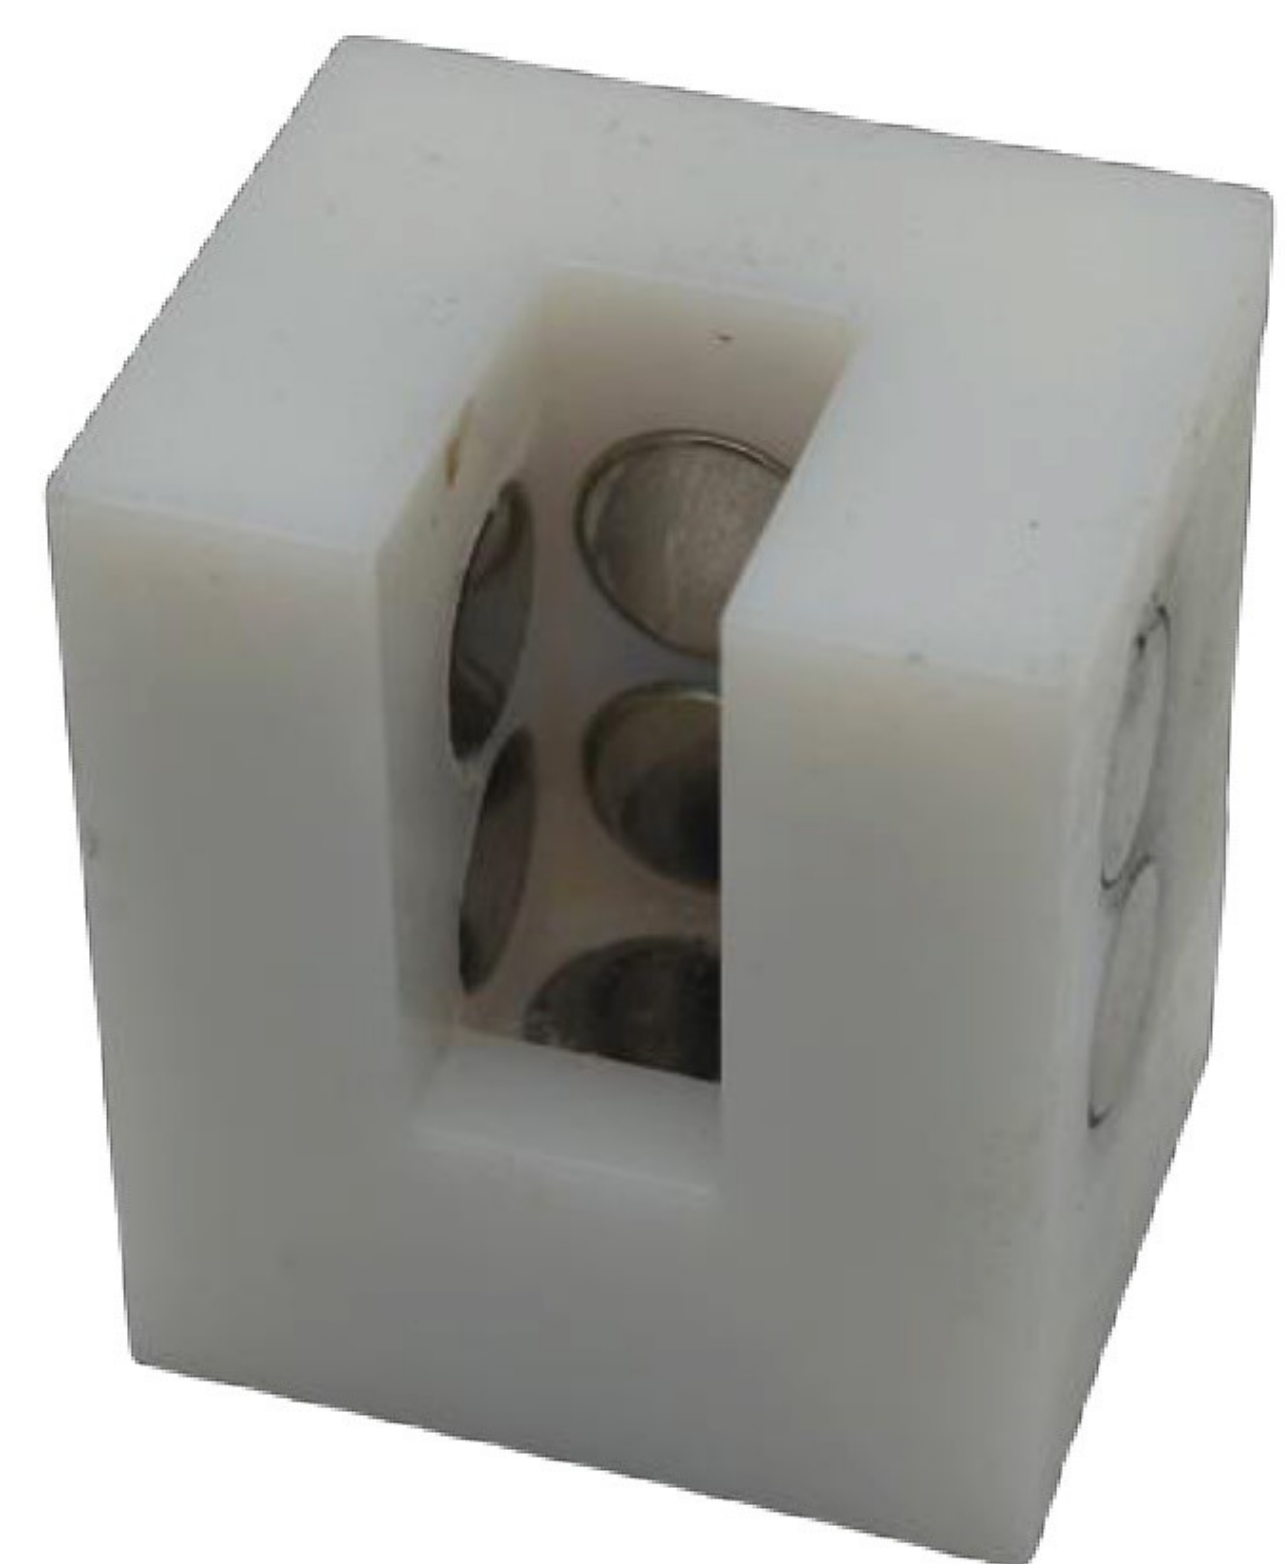

Horizontal chamber

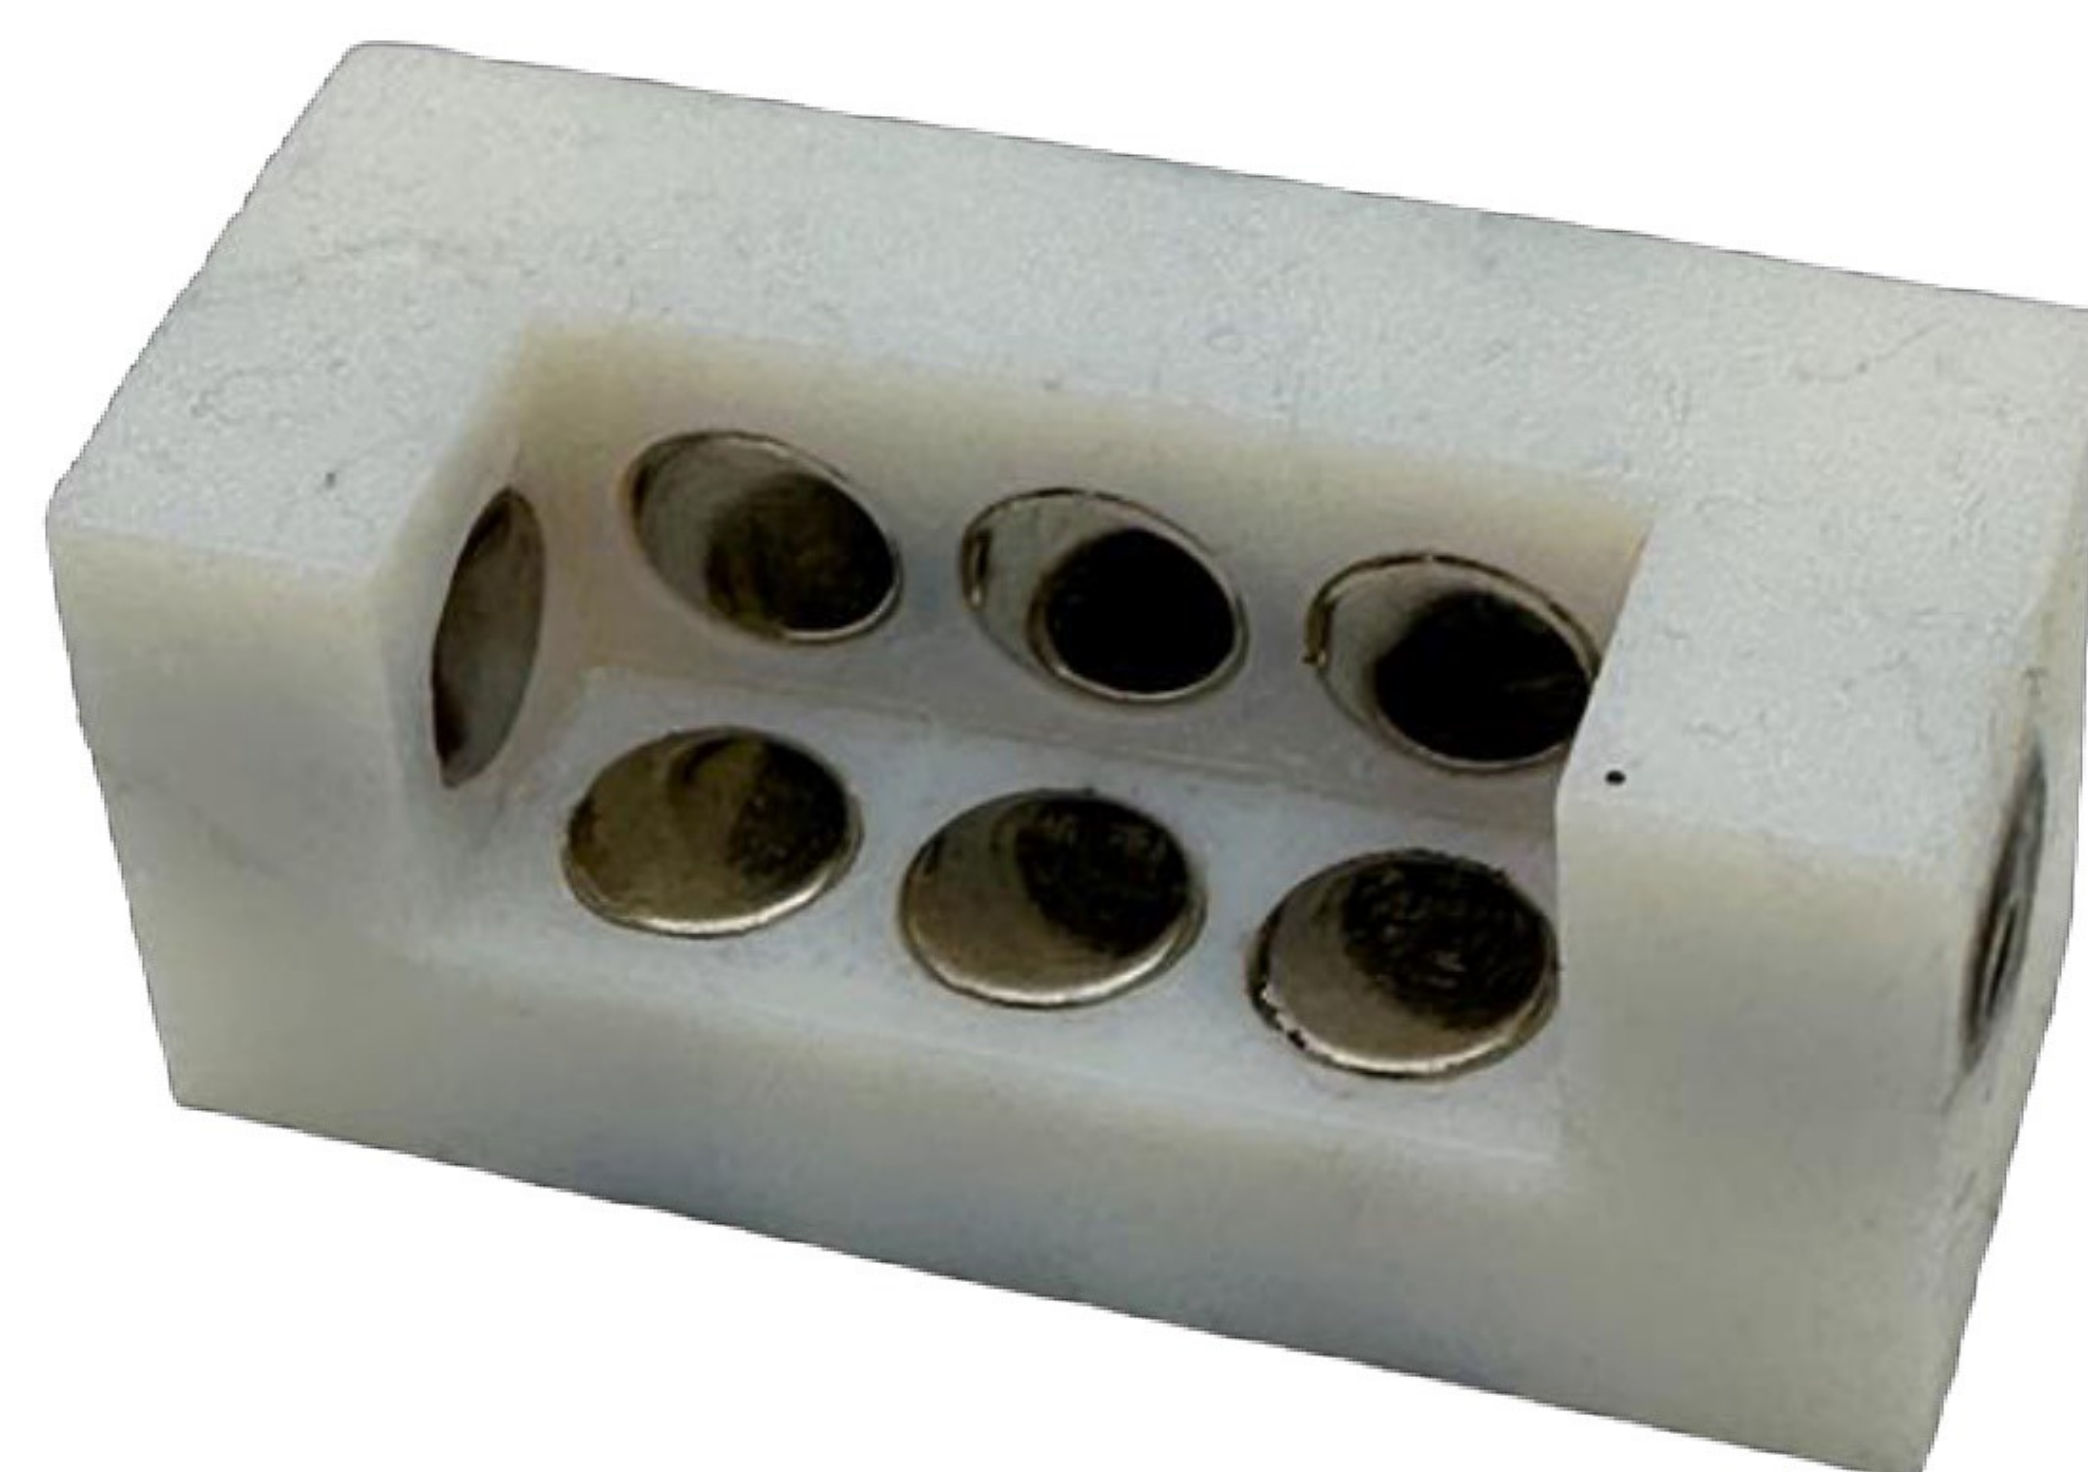

Square chamber

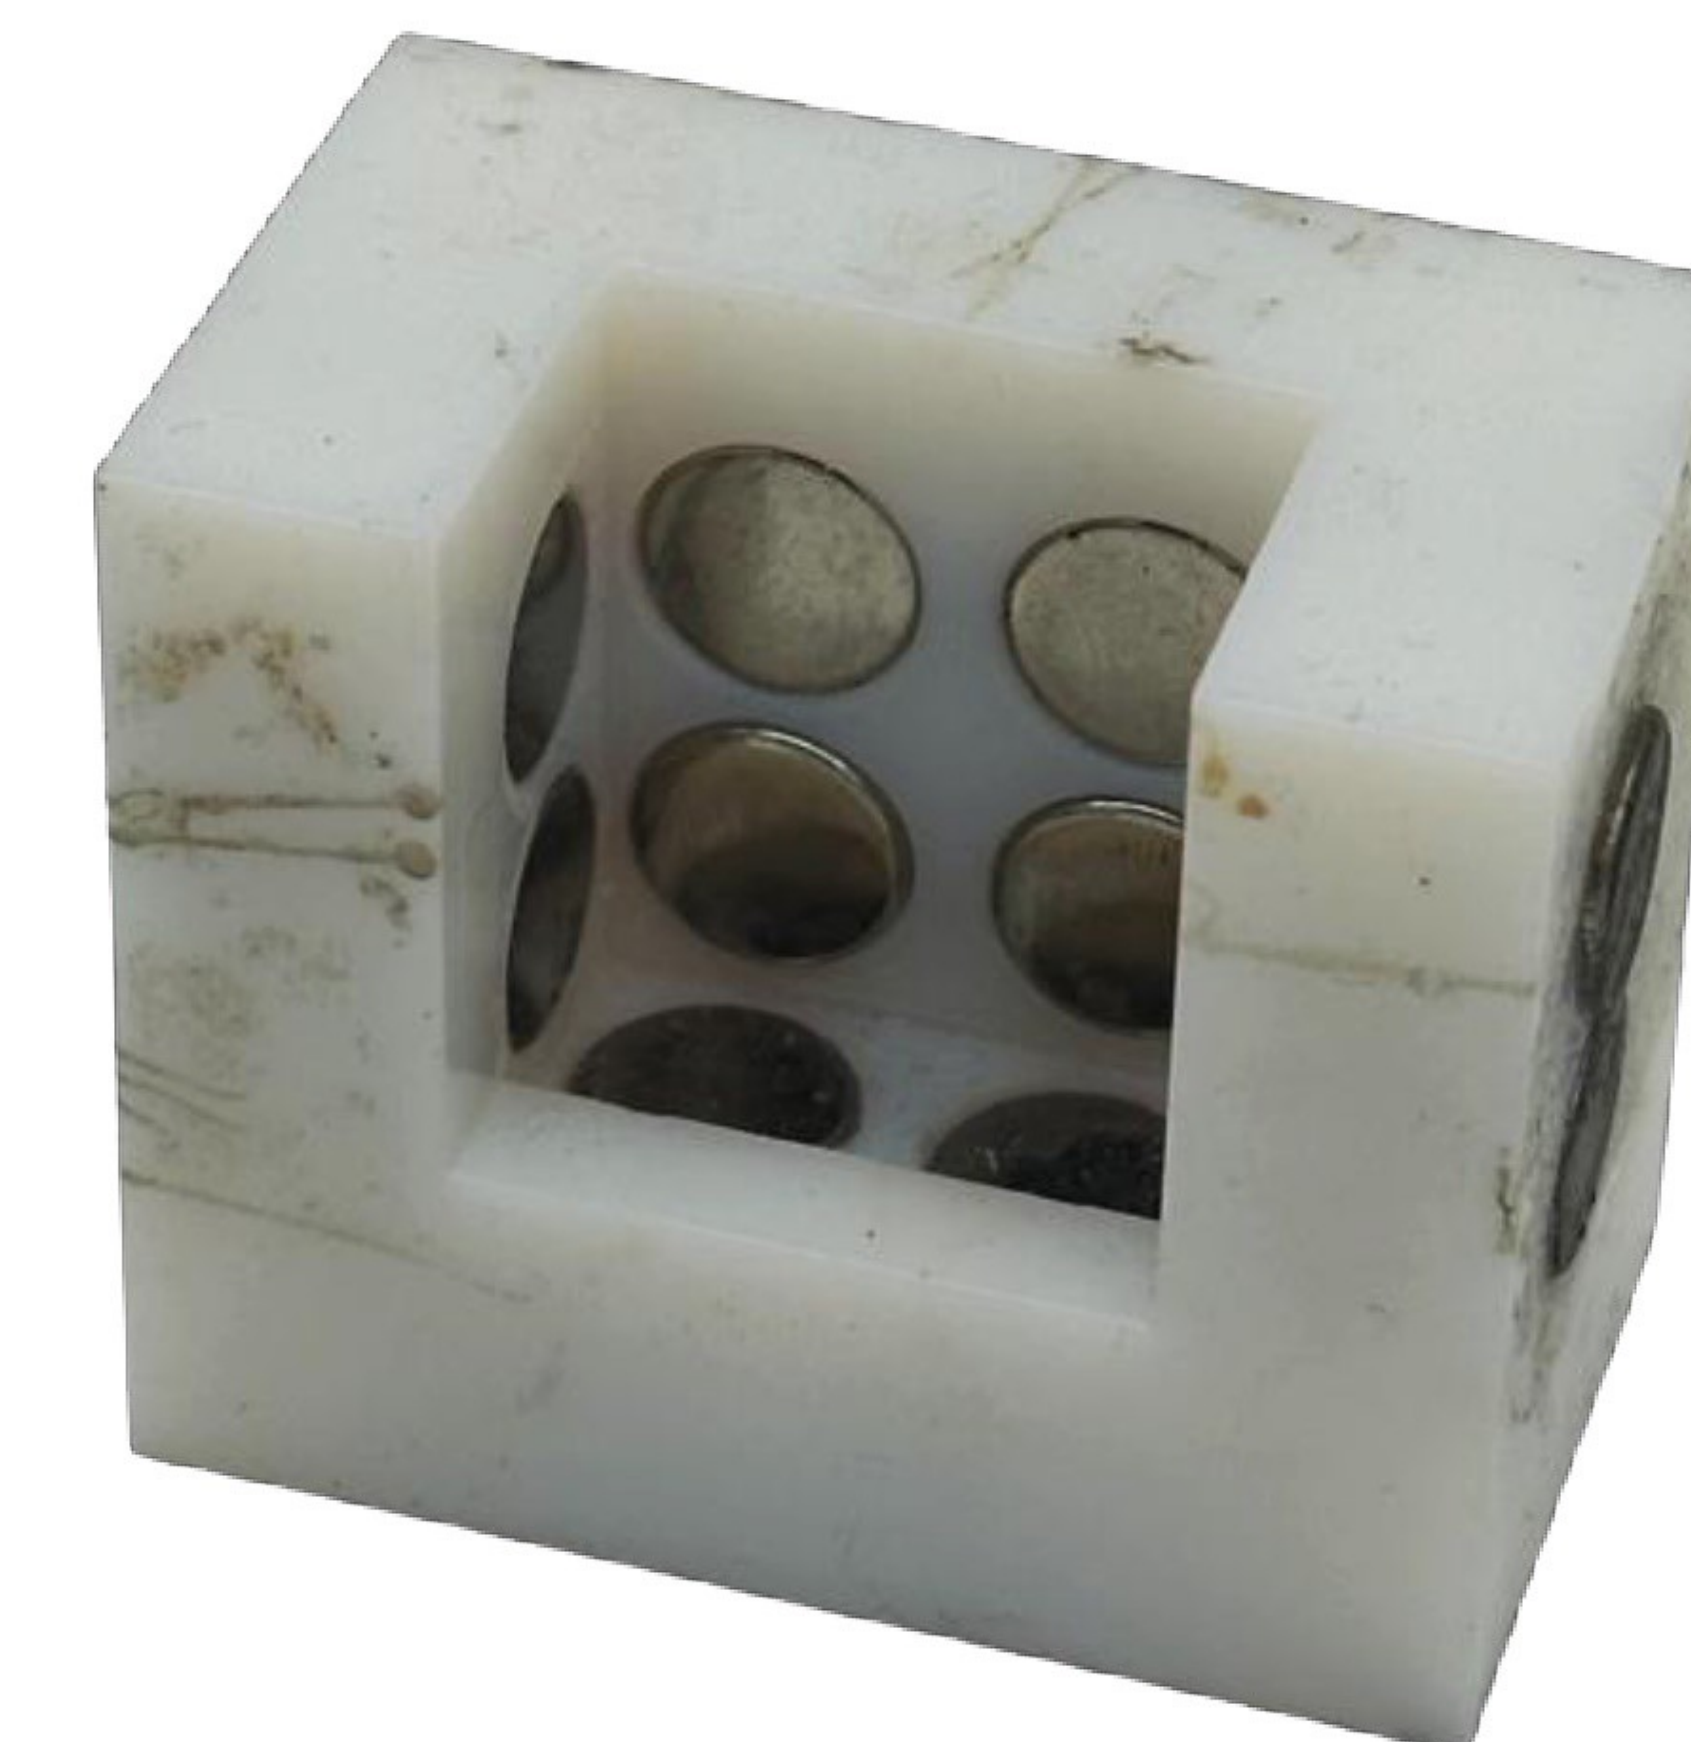

Front and top views

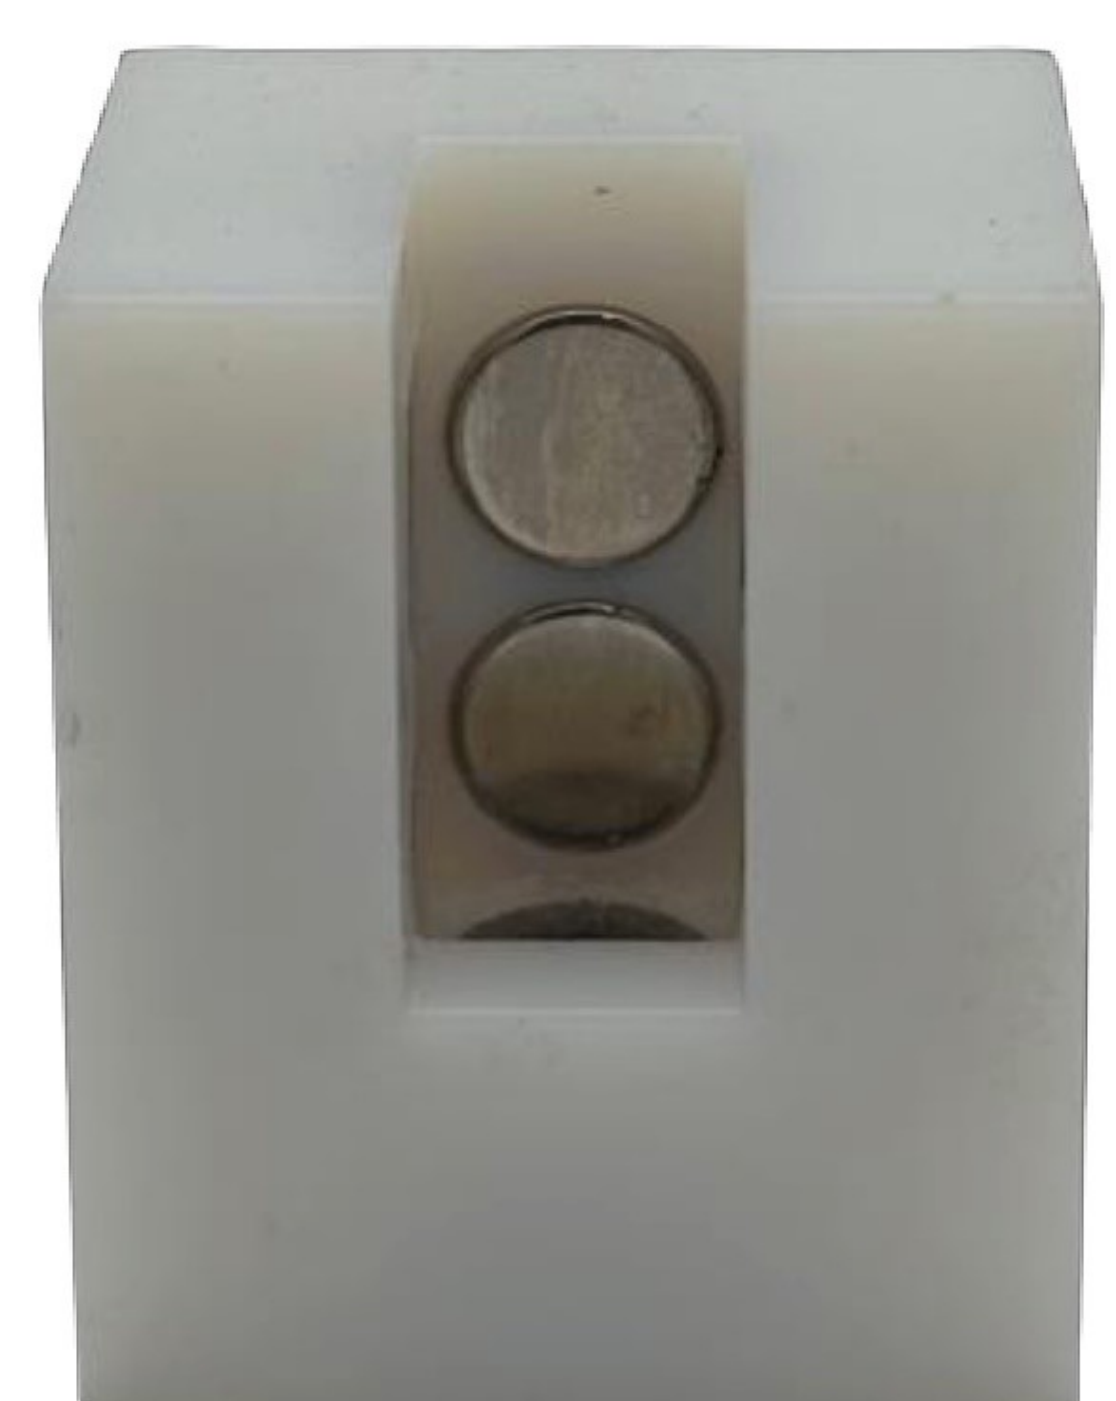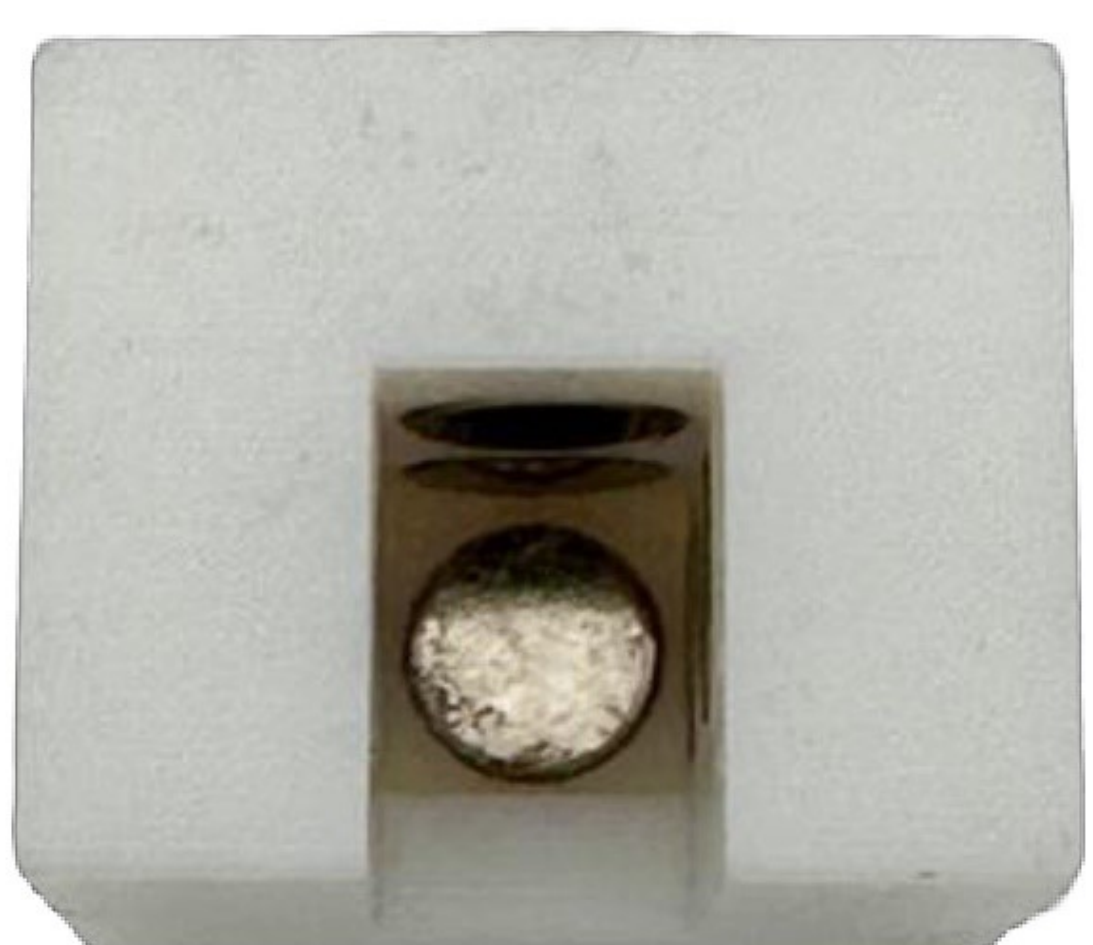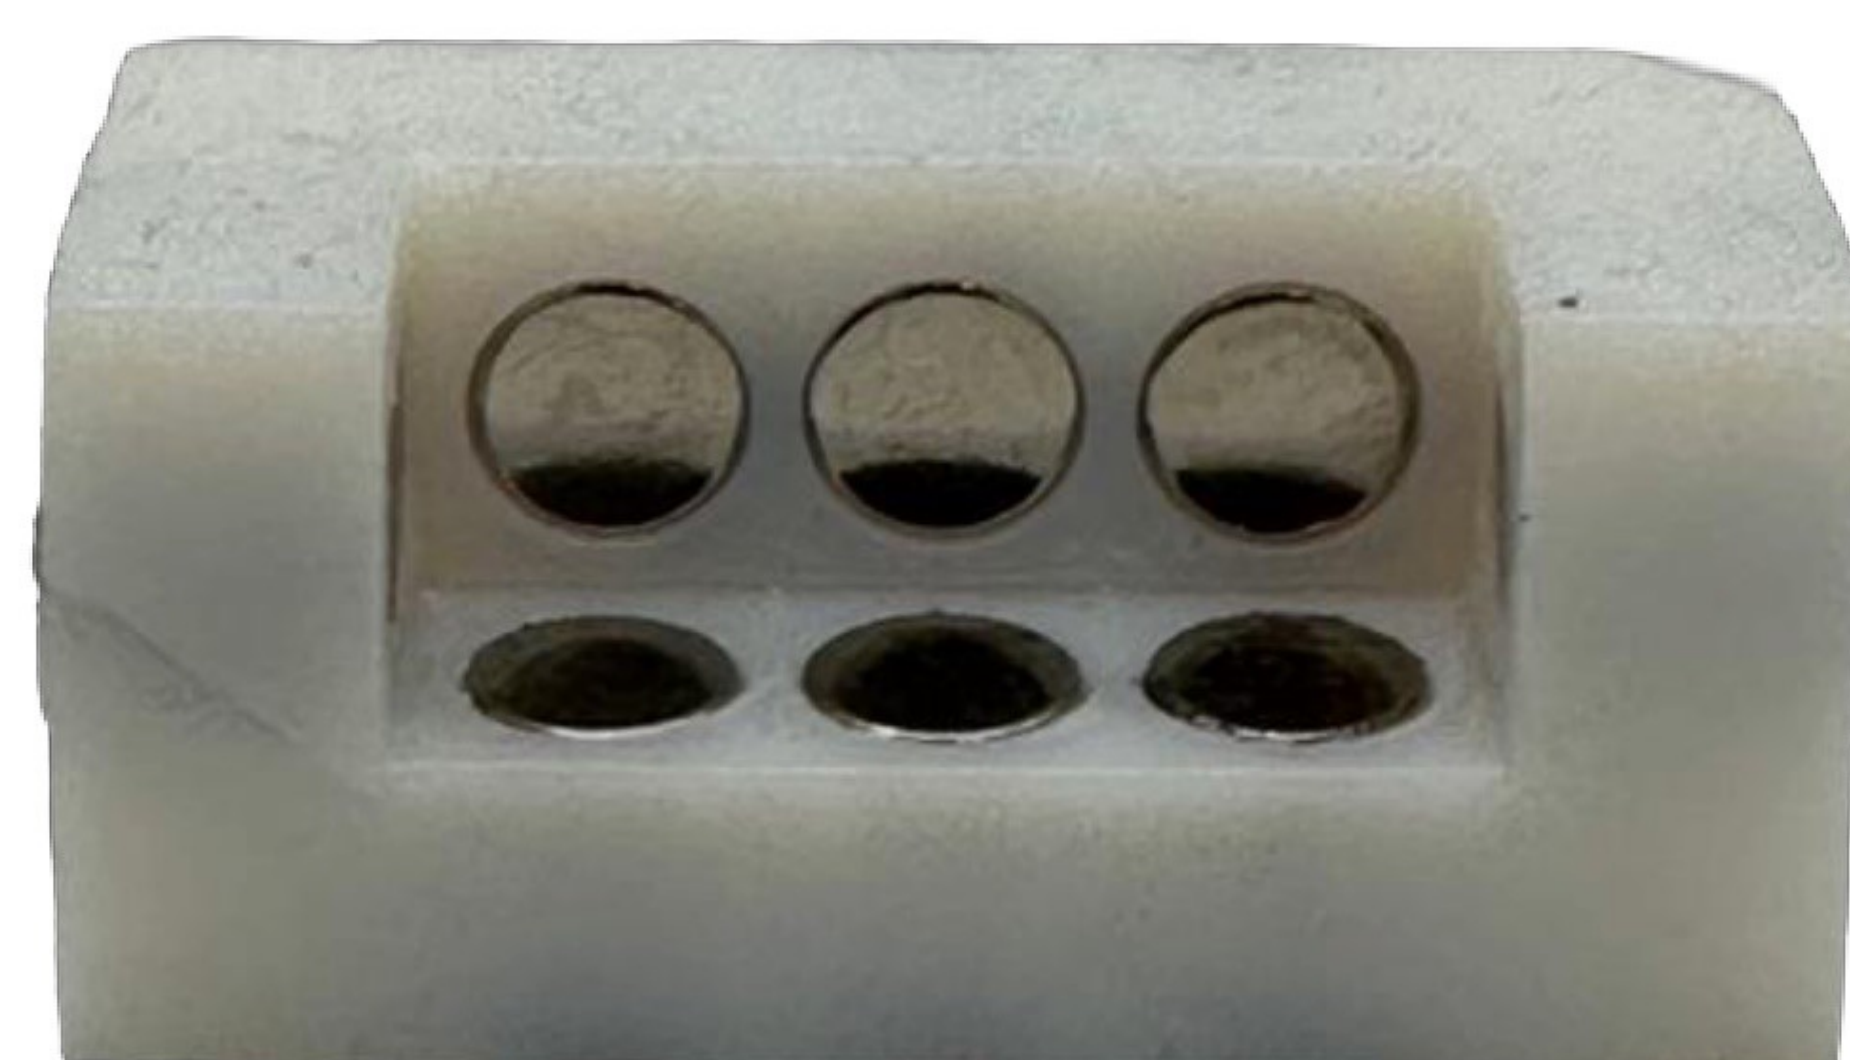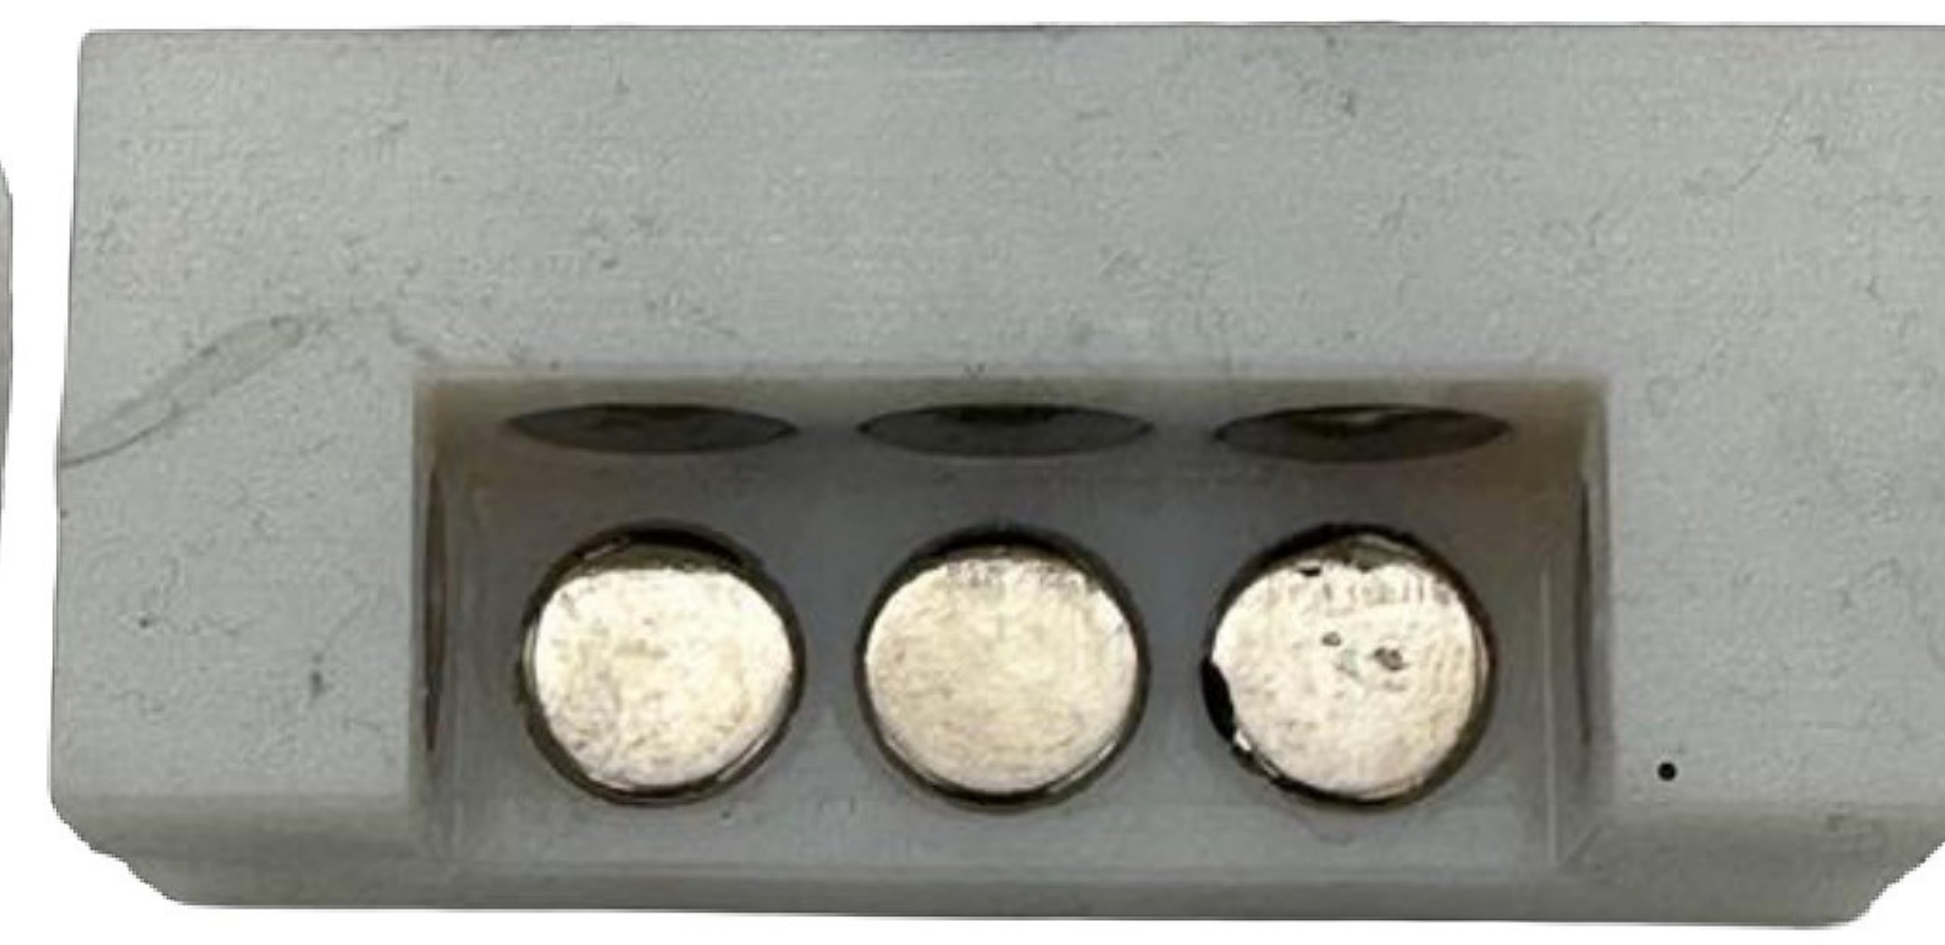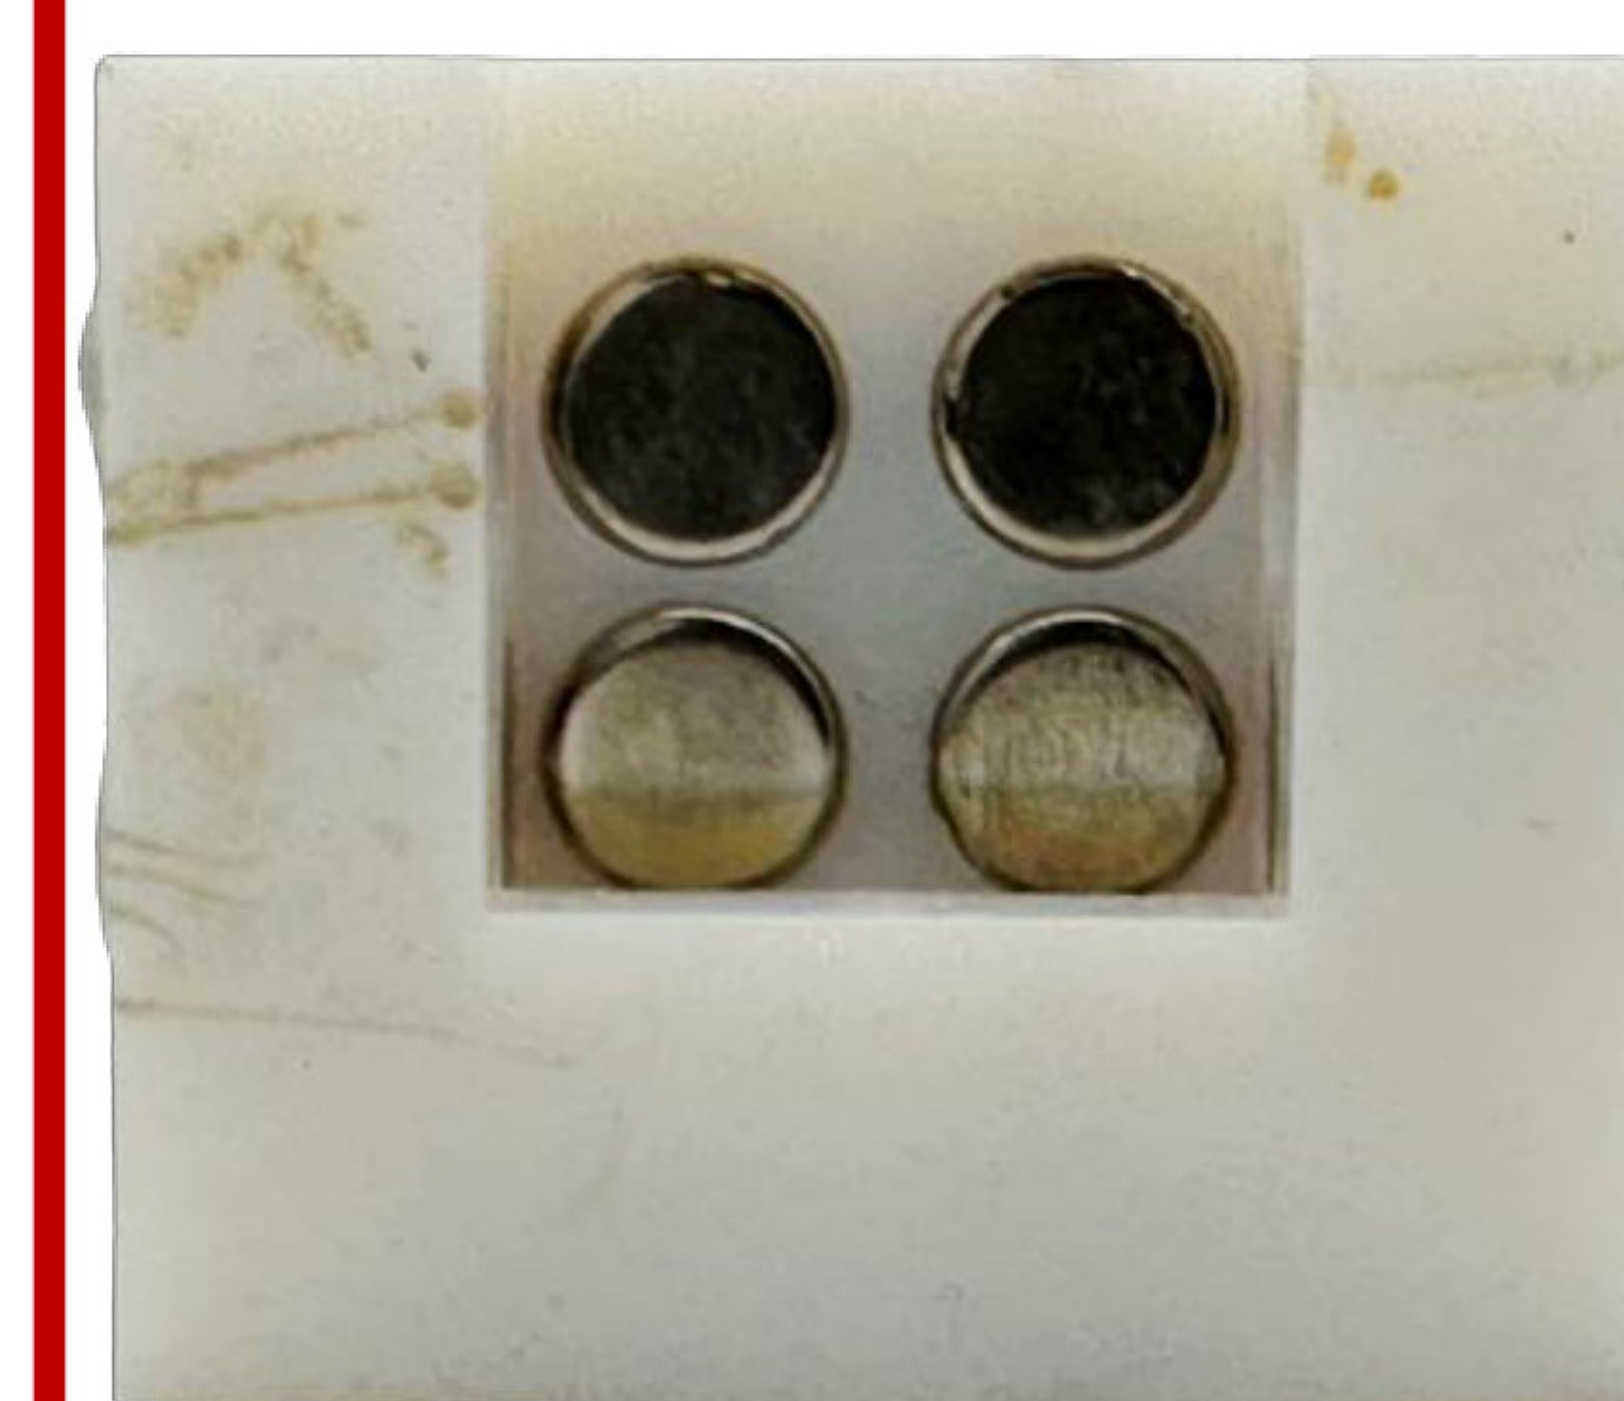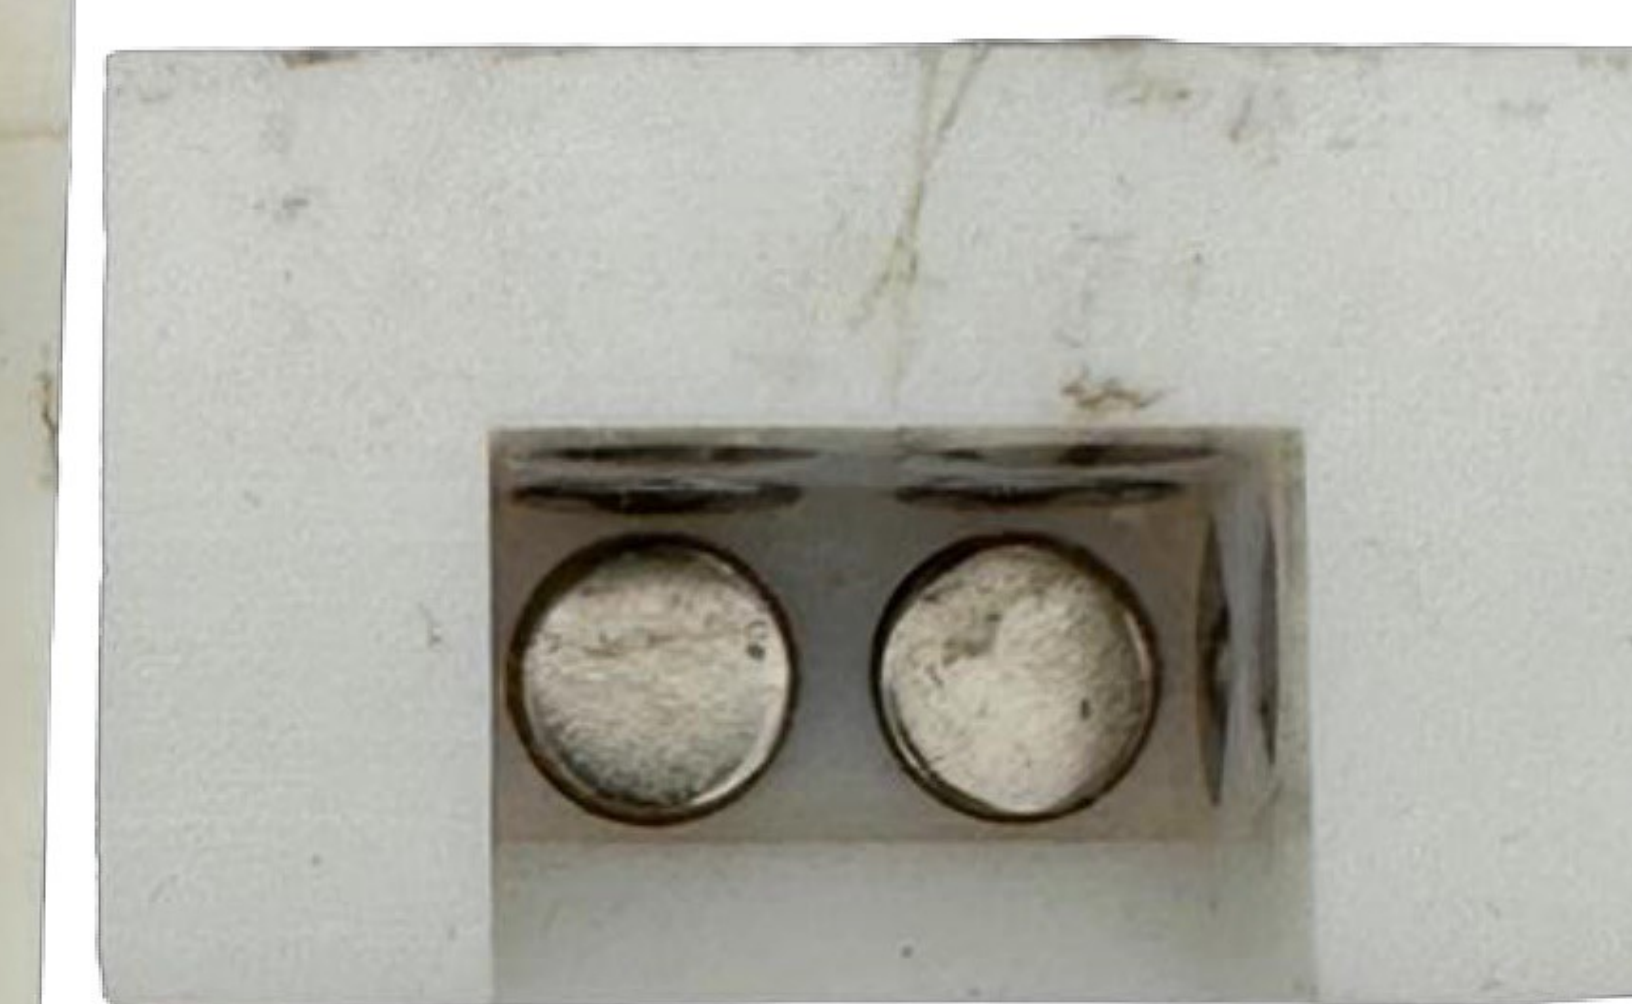

Modeled Magnetic Field

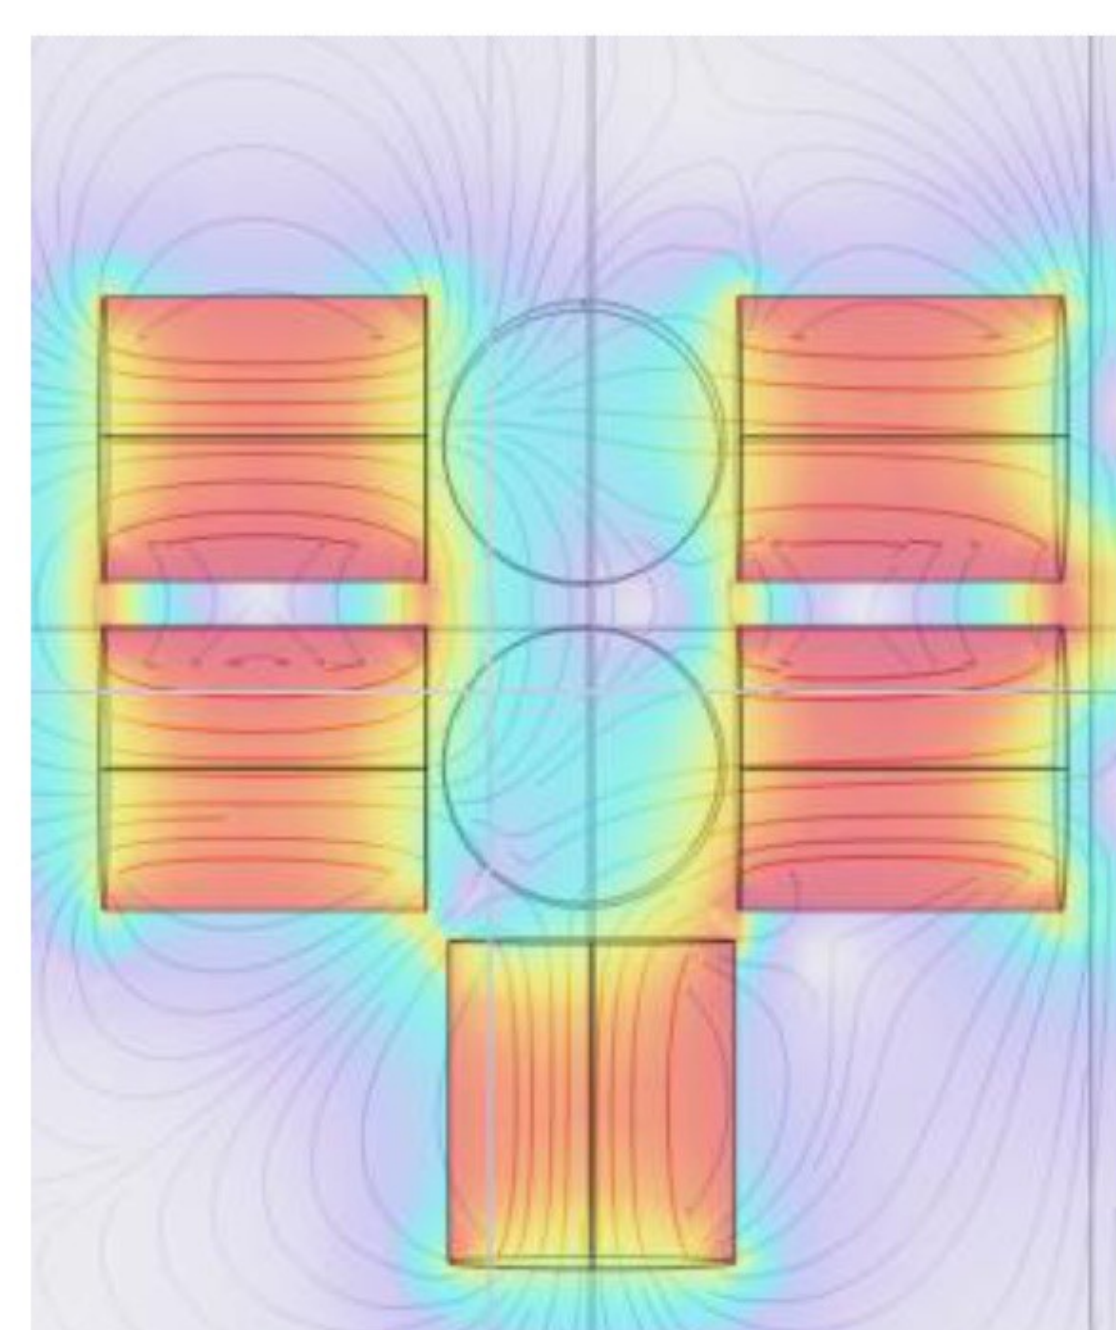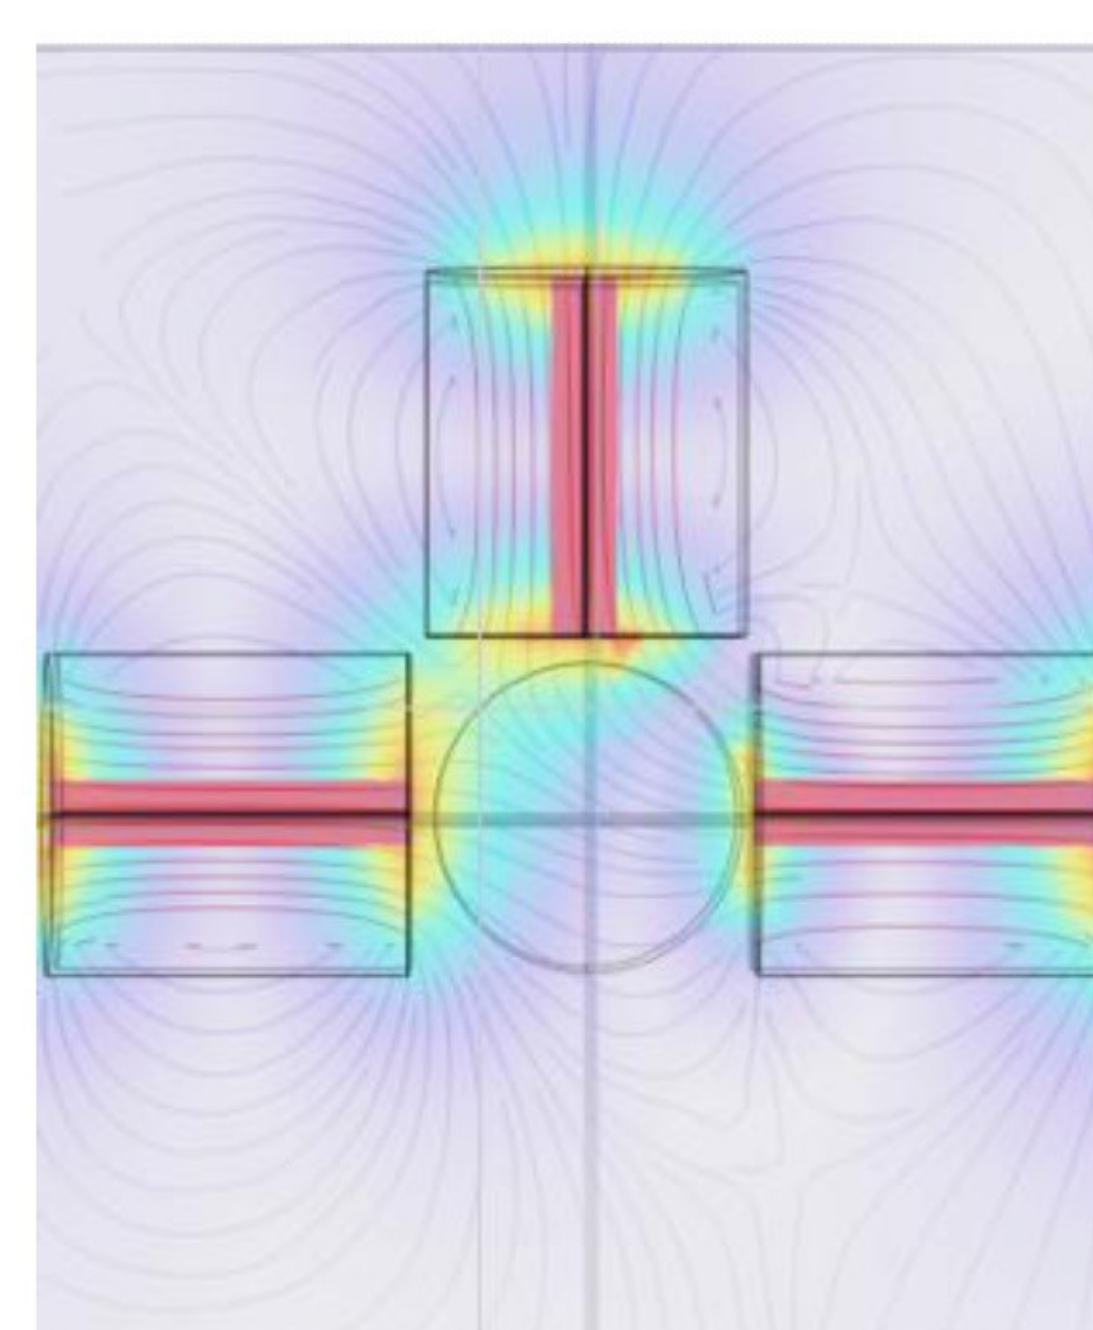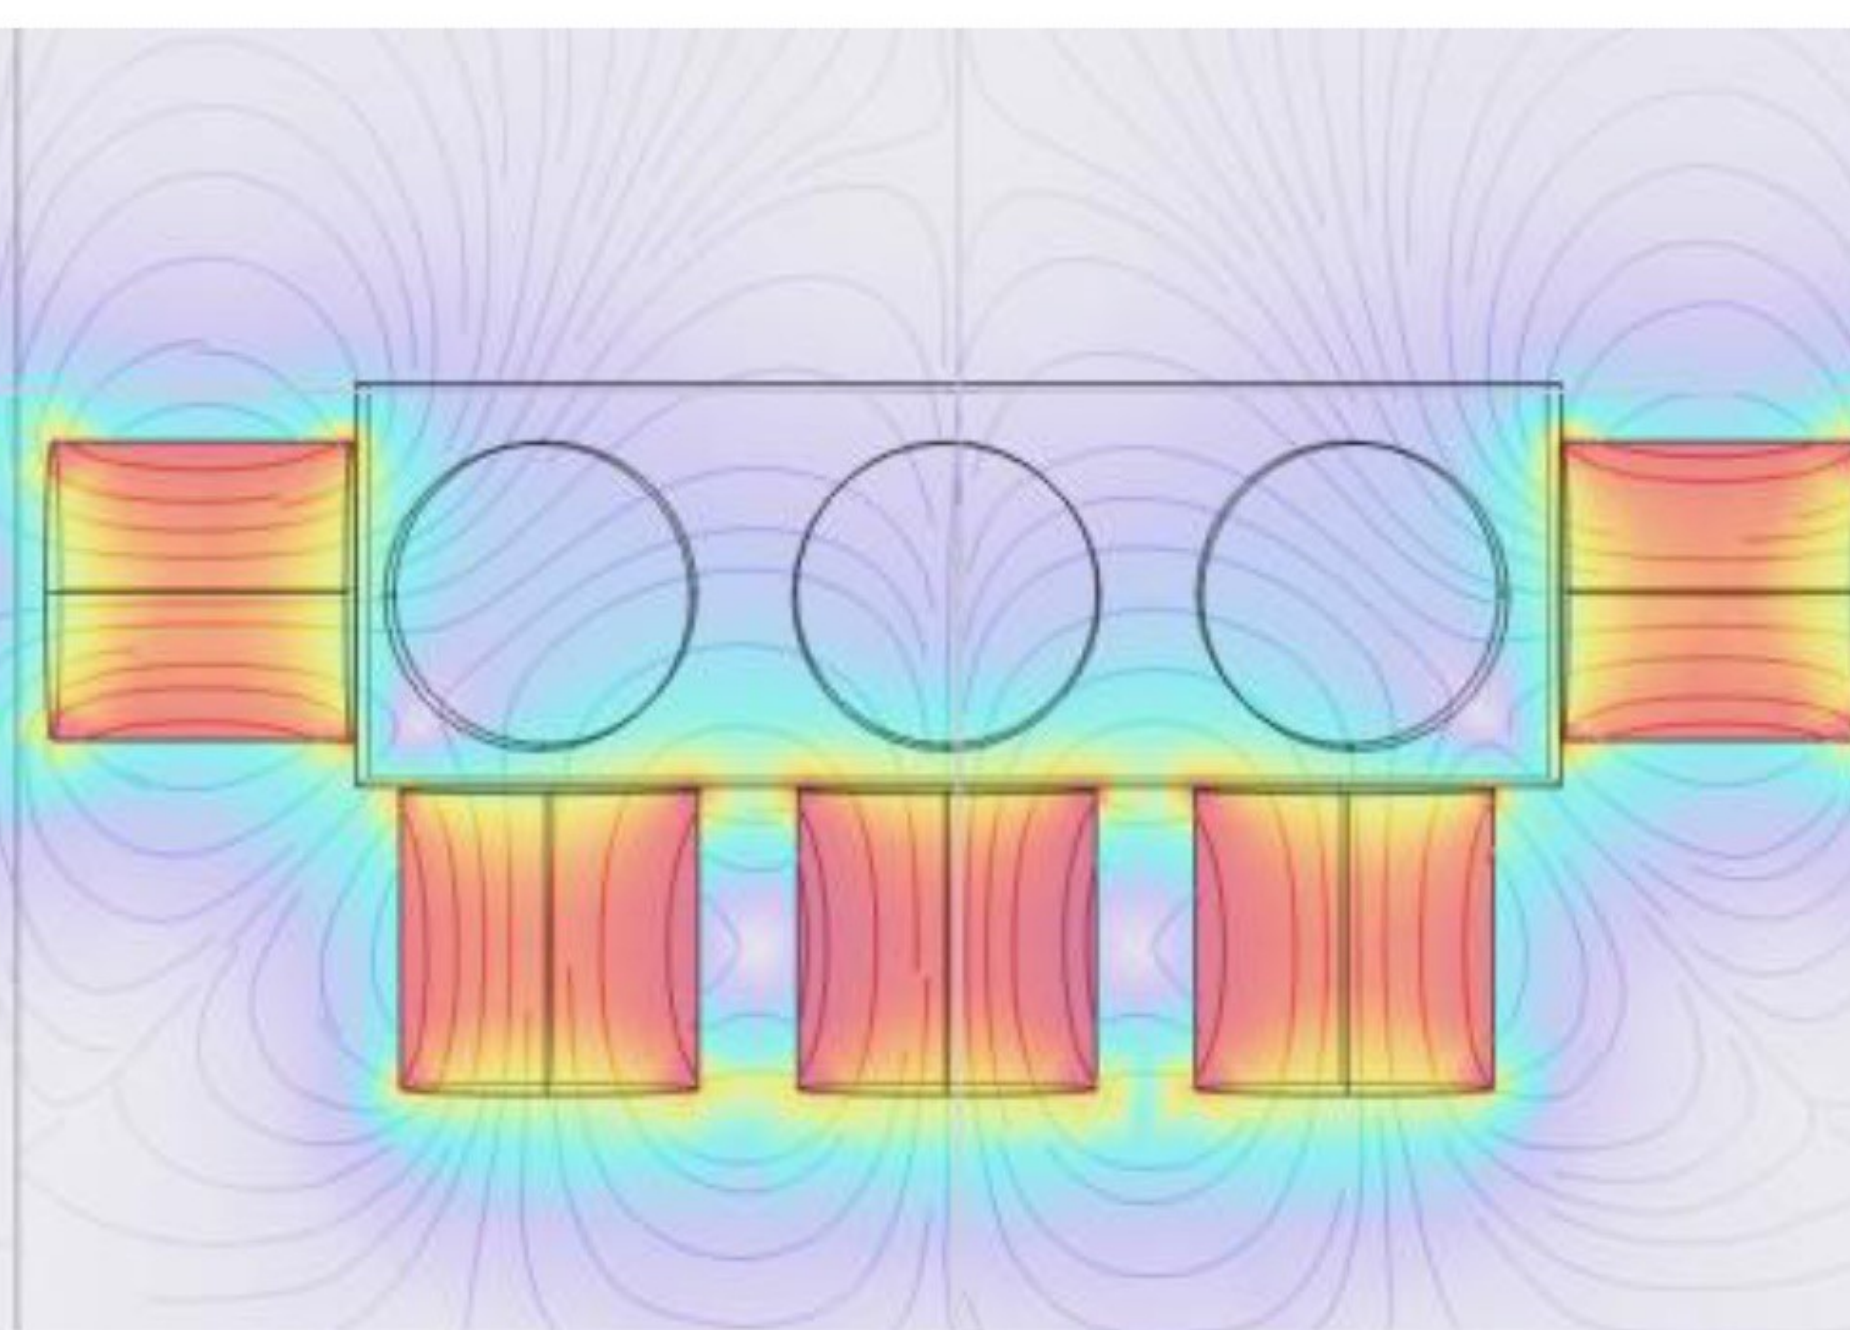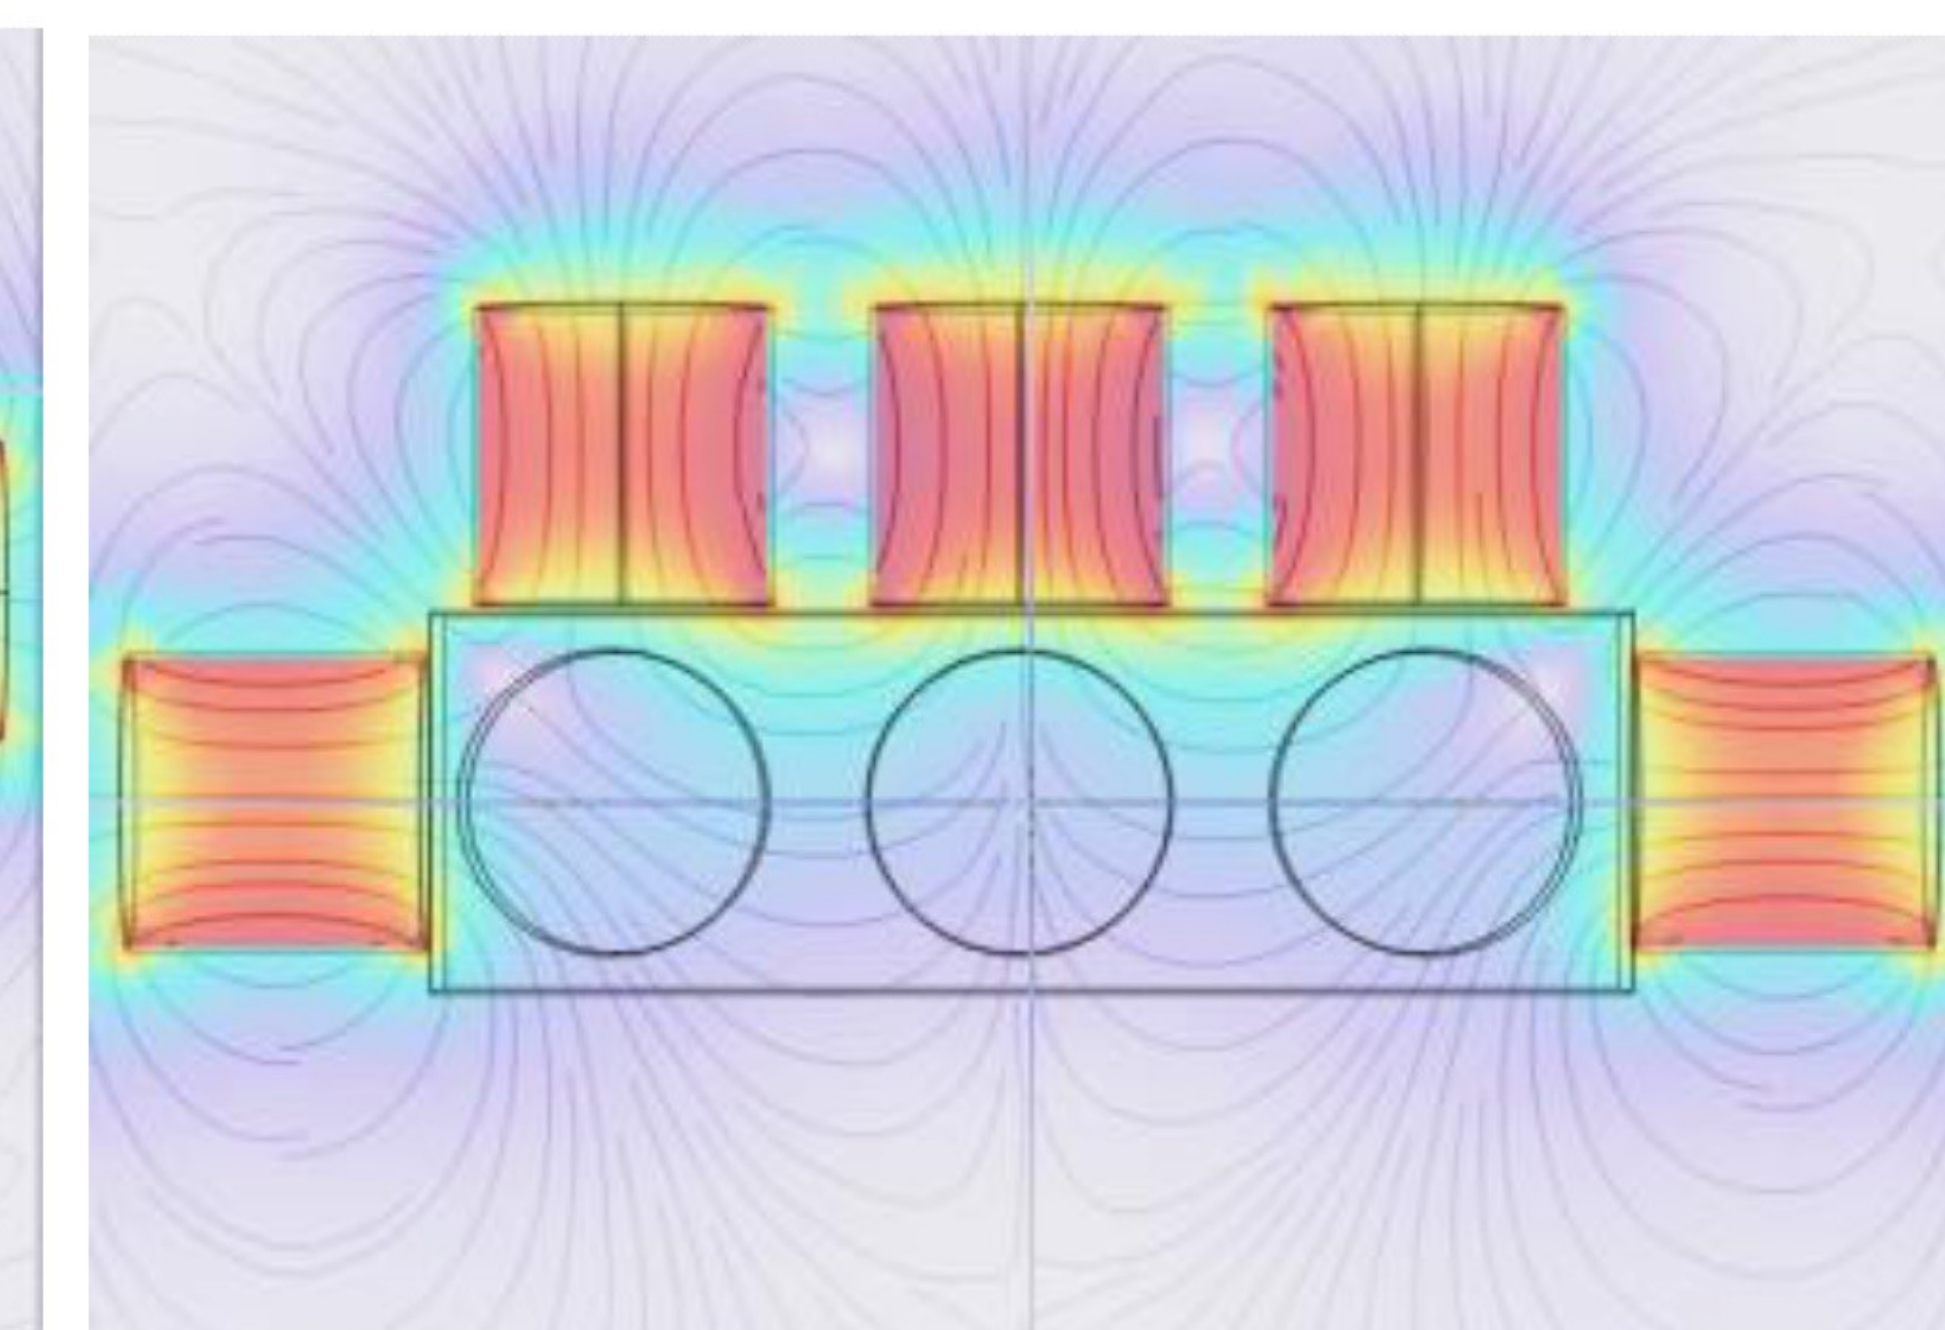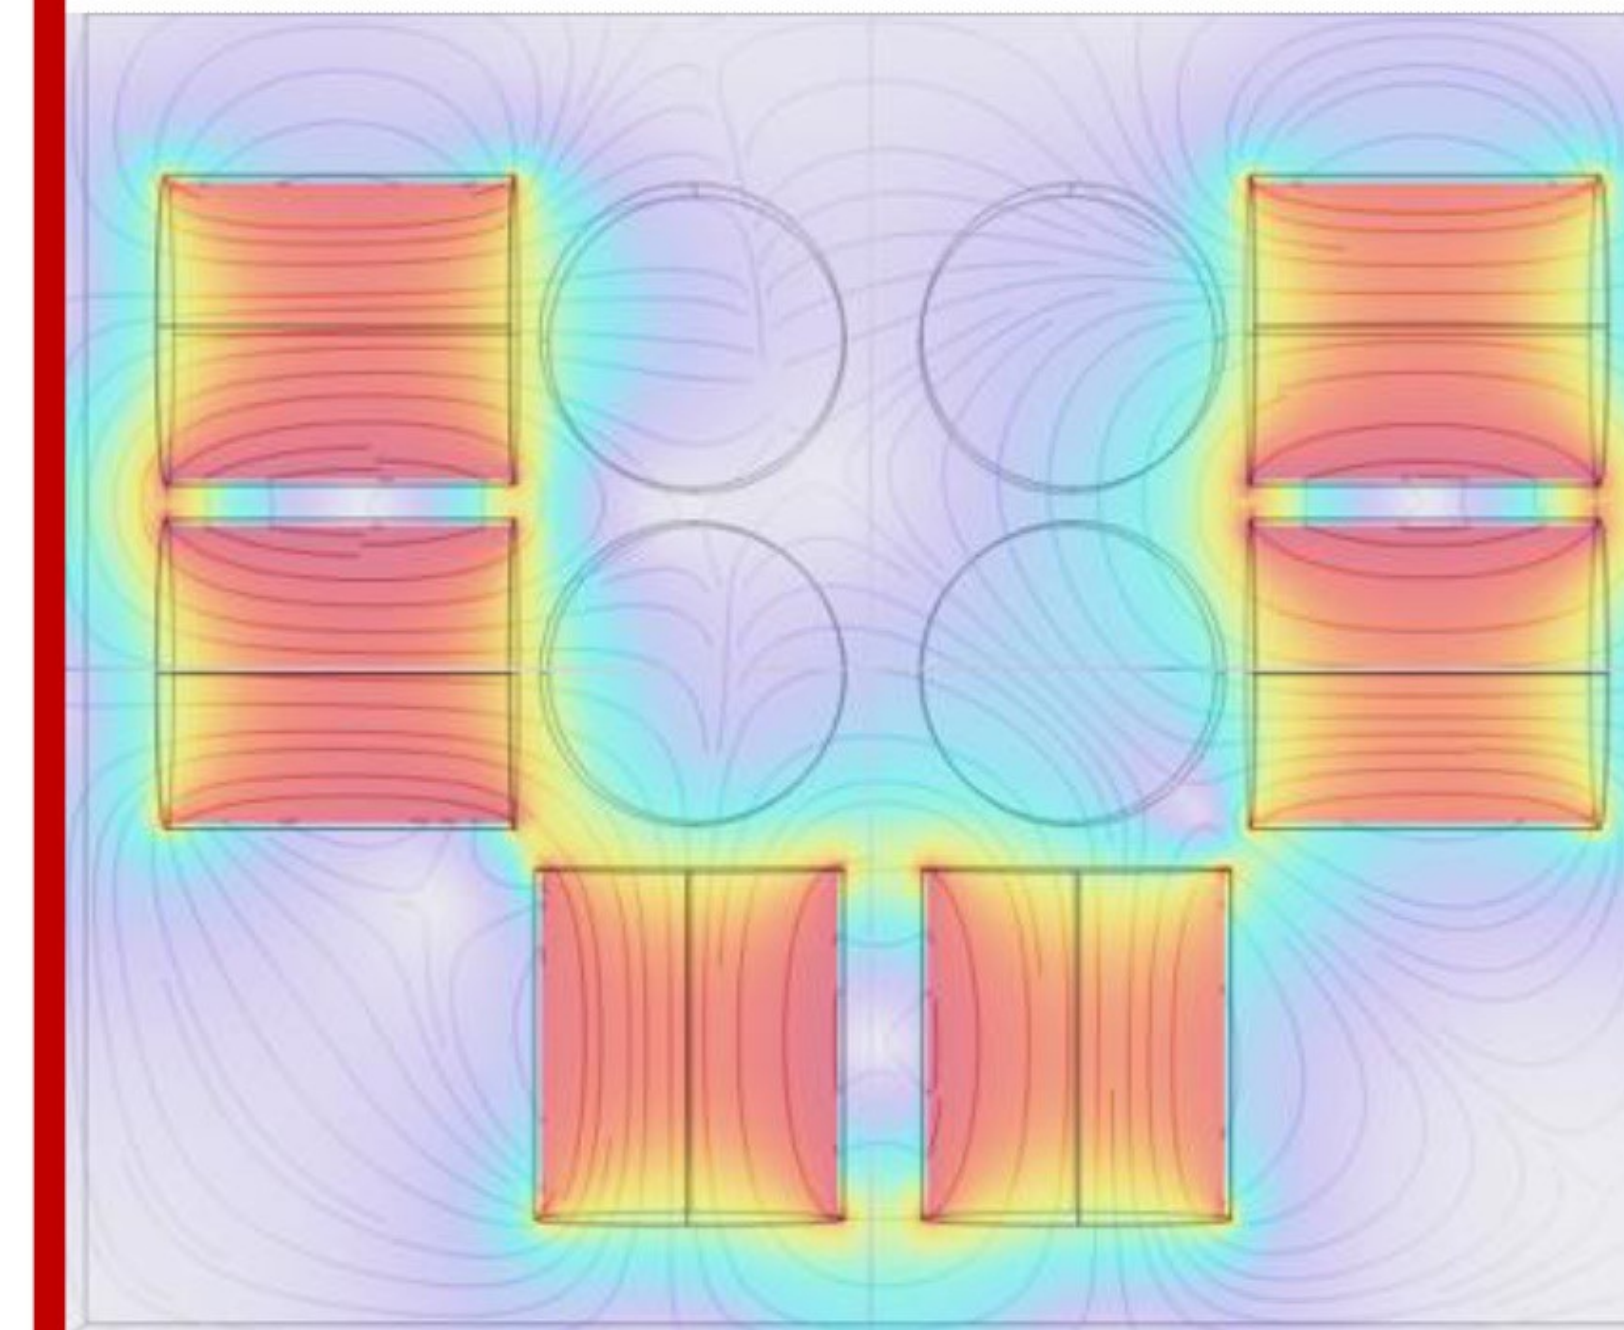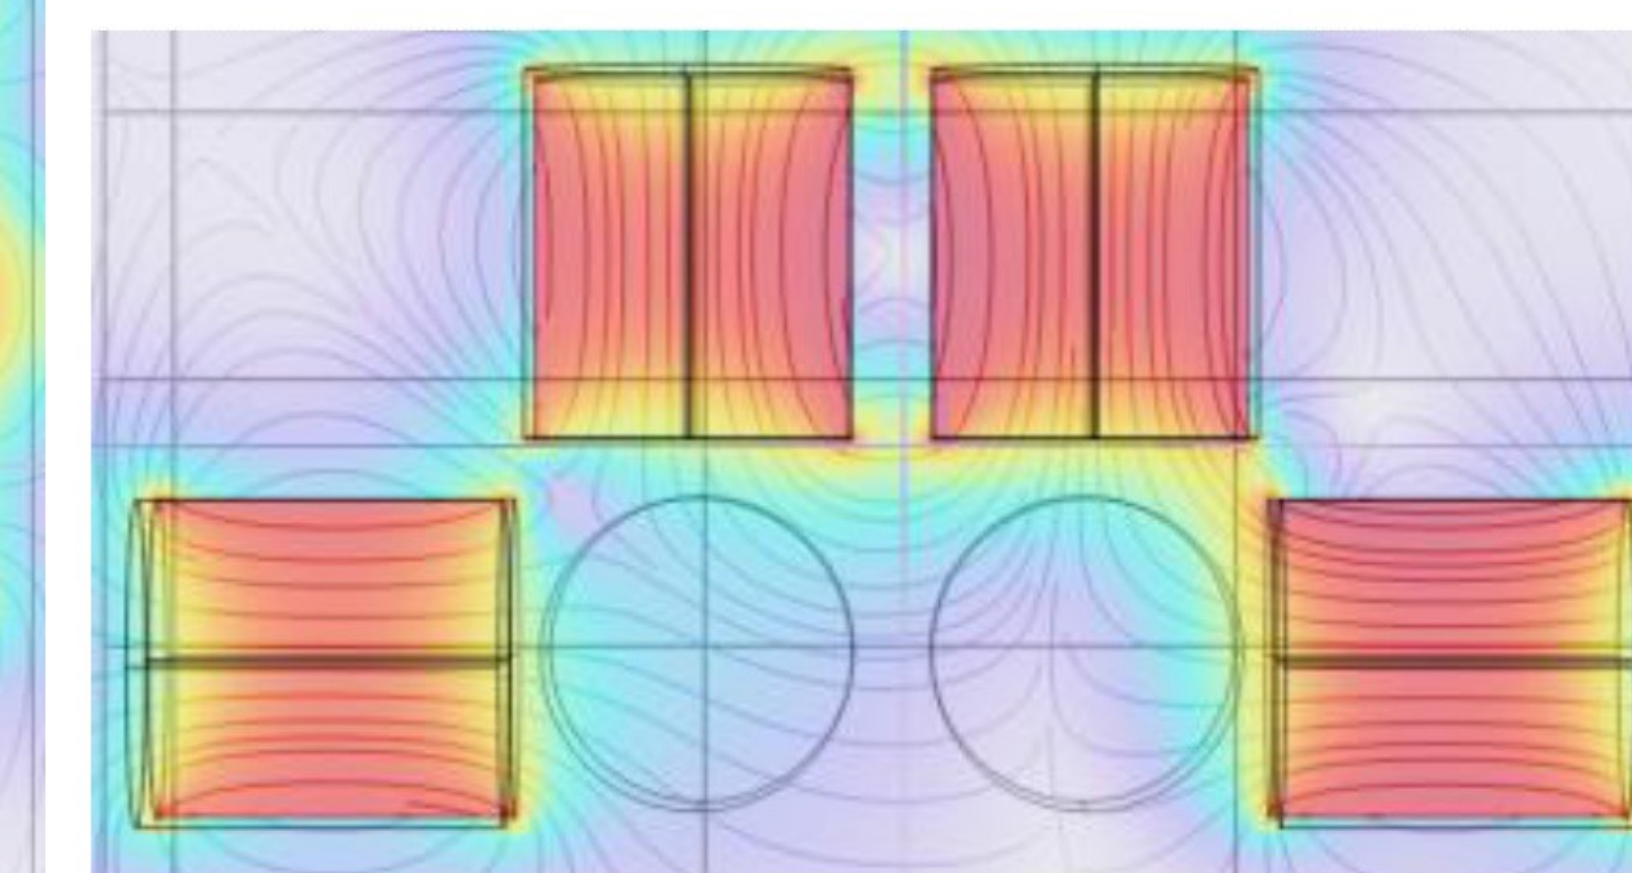

Observed RBC Separation

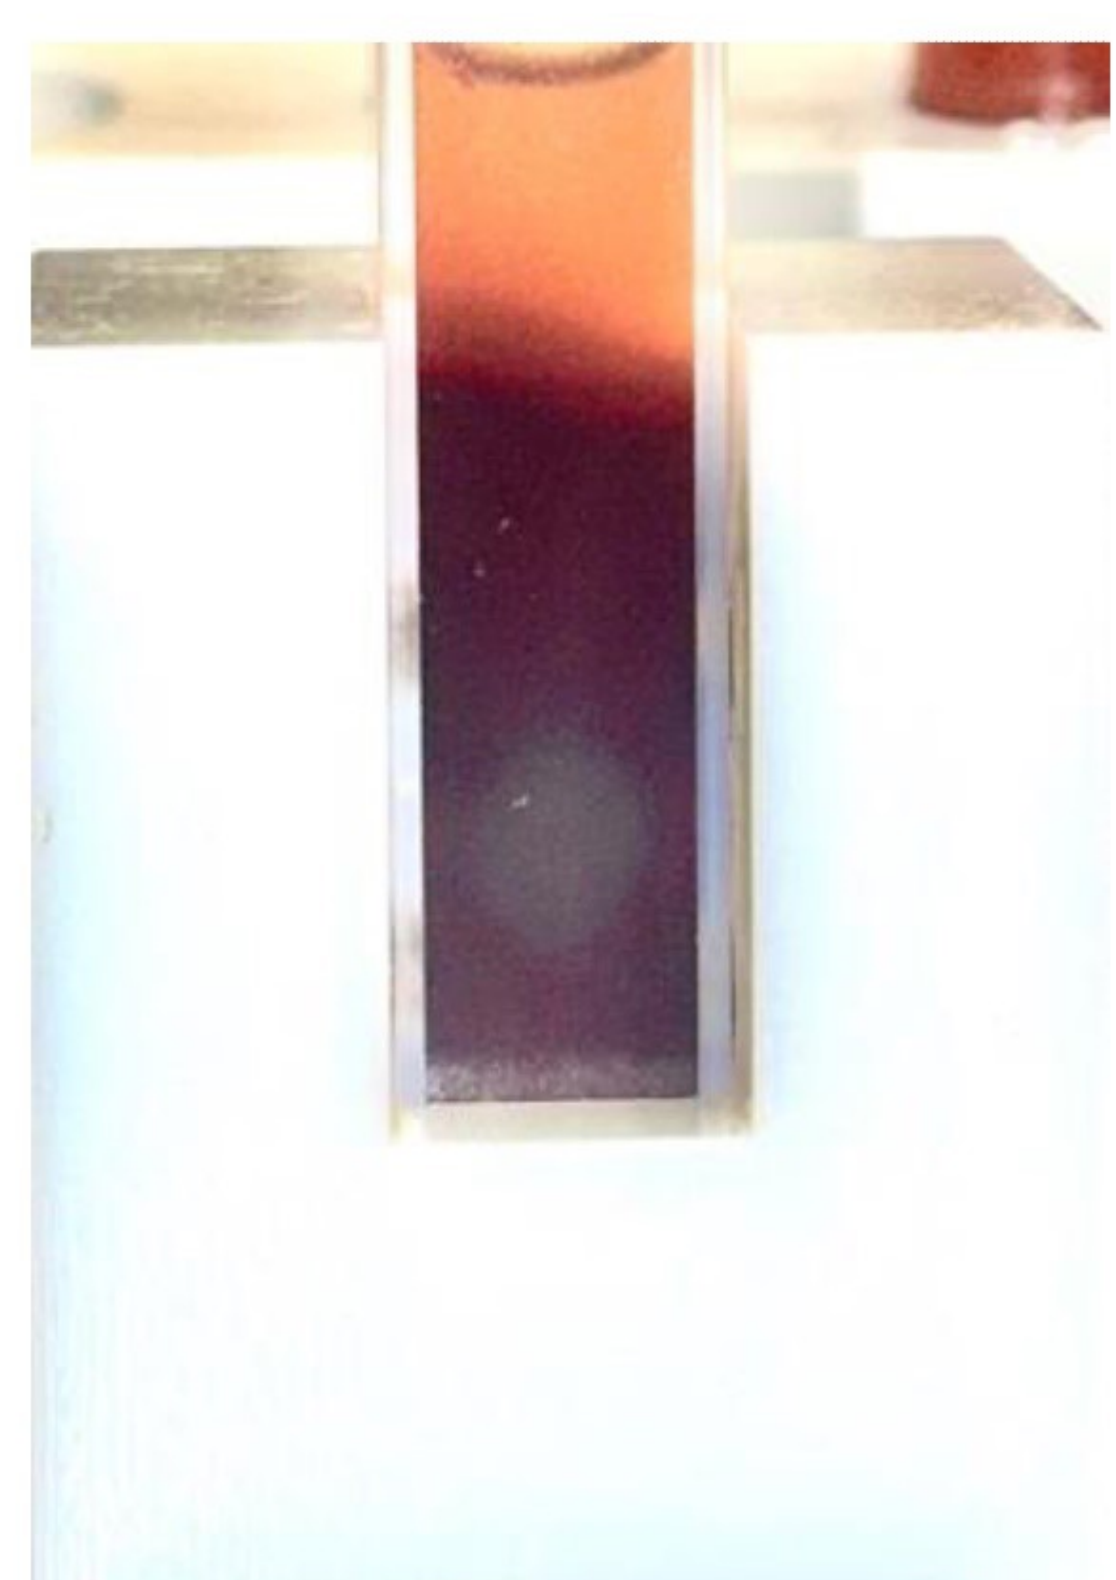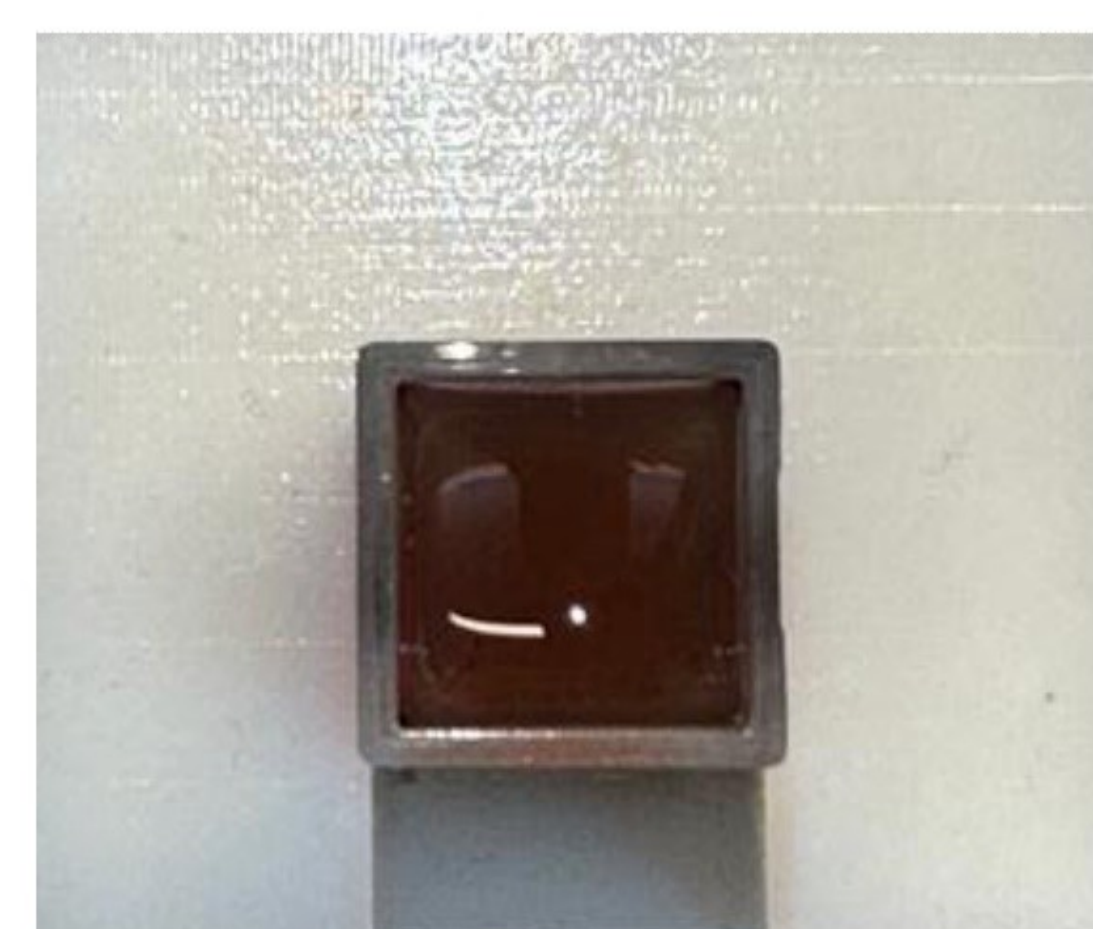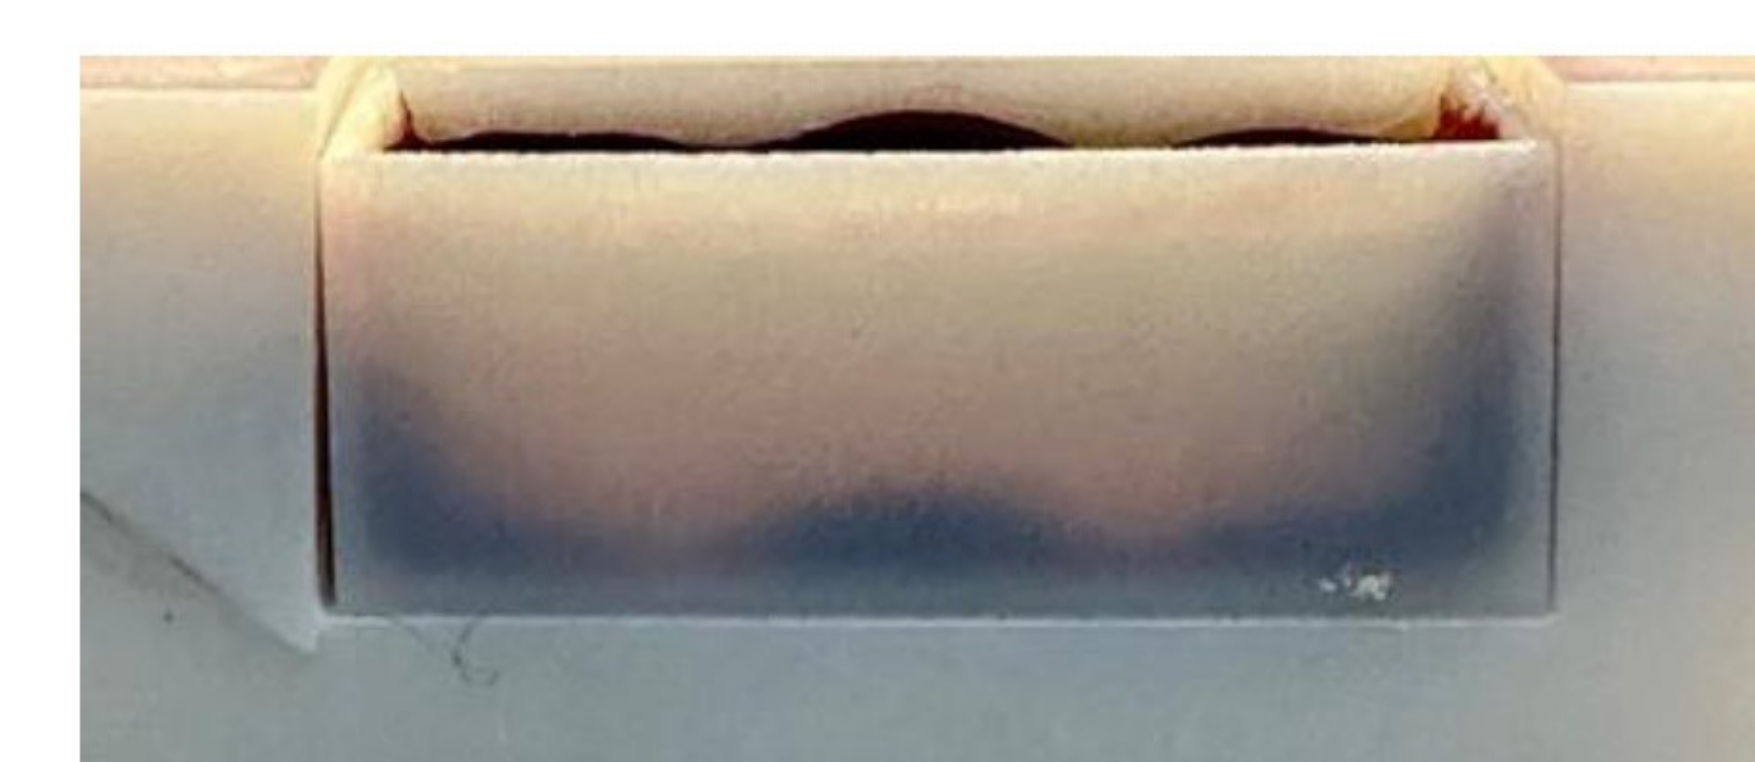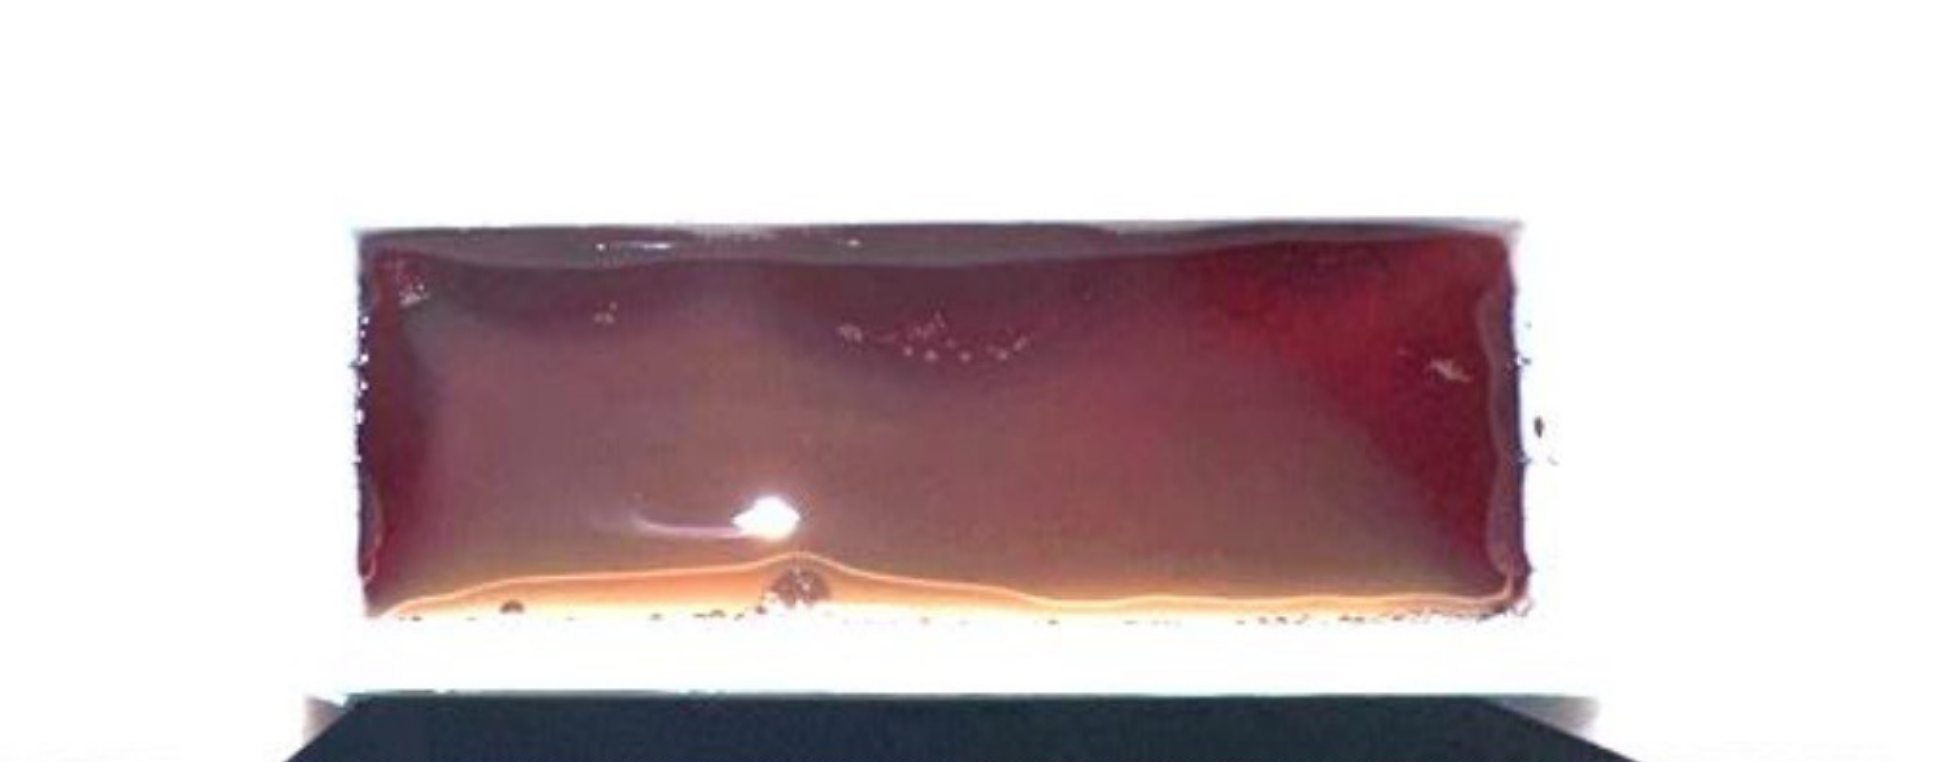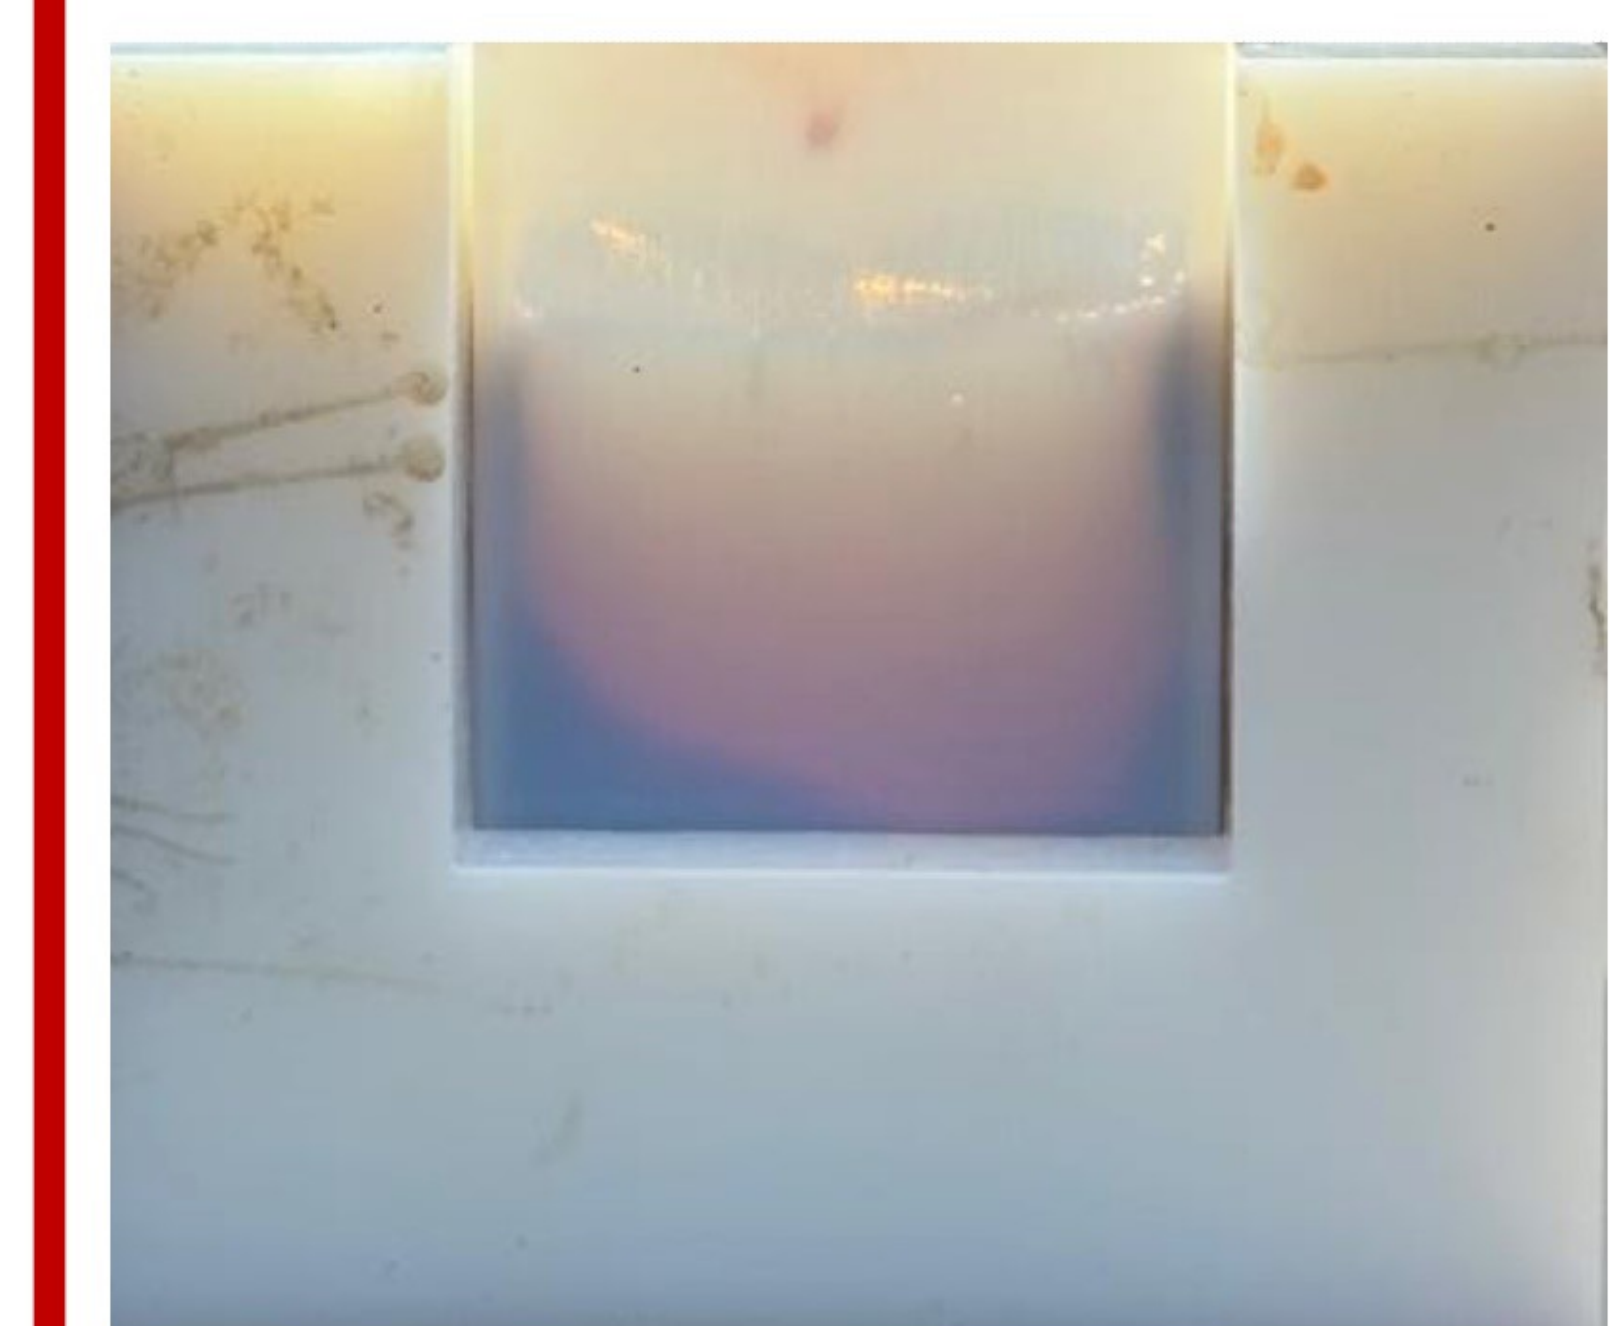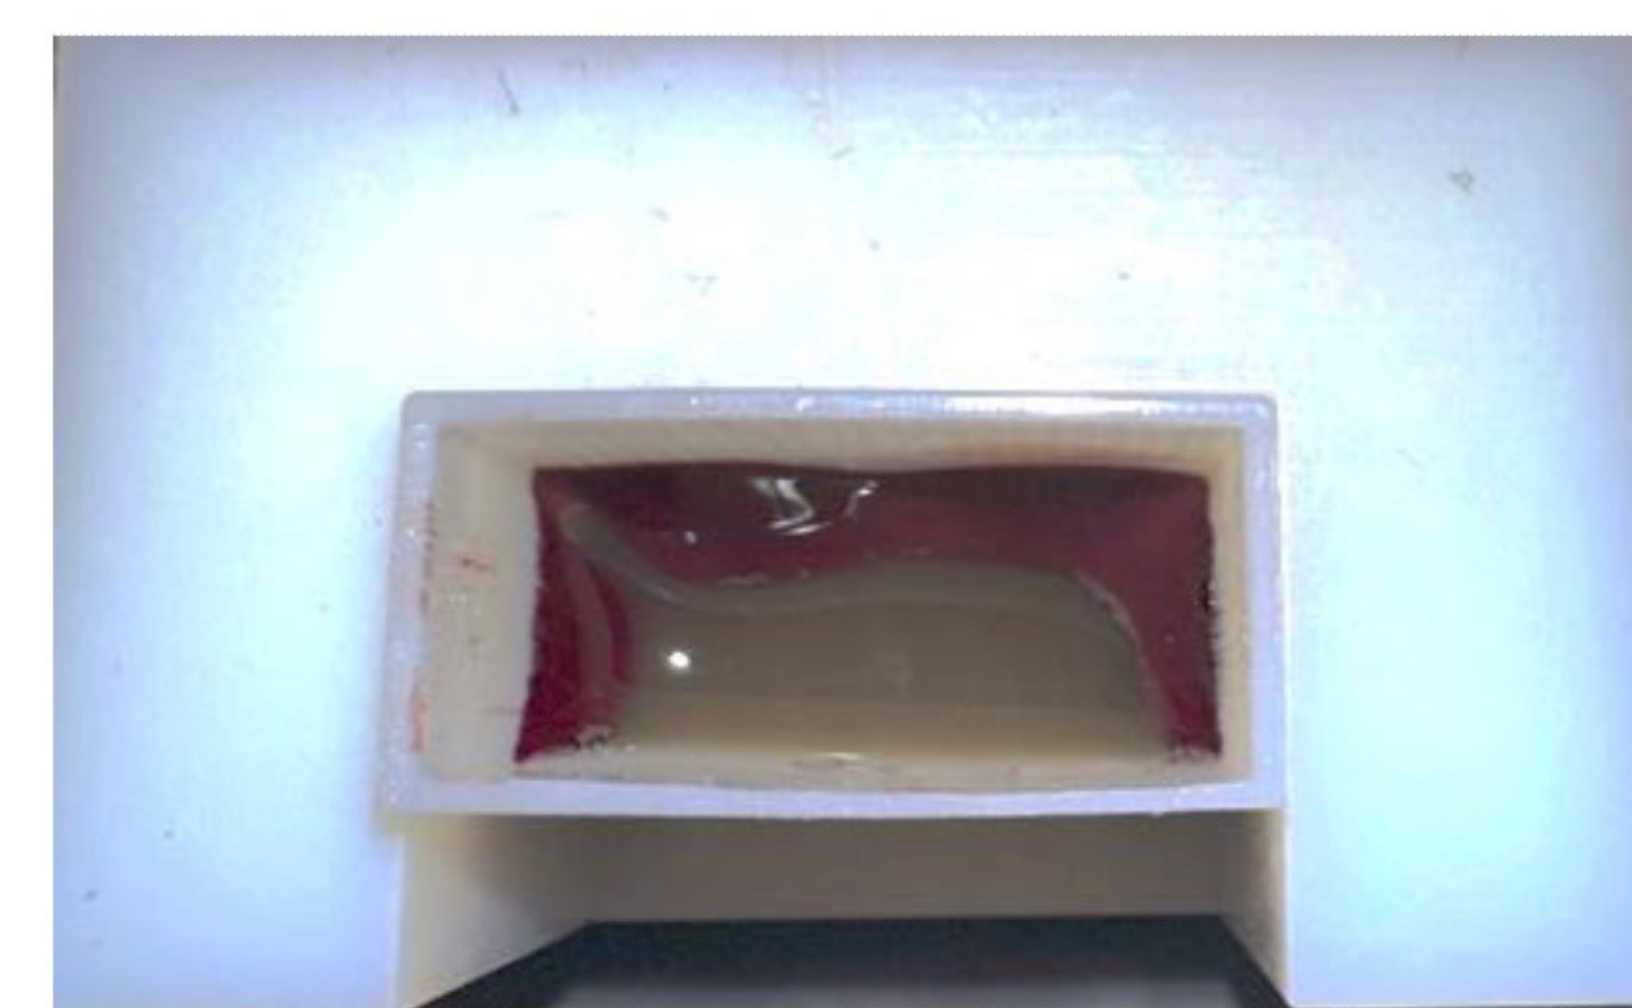

Supplement: d6lc00135a2.pdf [file d6lc00135a2.pdf]
