# Supplementary material for: Centrifuge-free separation of plasma from milliliters of whole blood for point-of-care diagnostics
Source: Royal Society of Chemistry journal article supplement (doi:10.1039/d6lc00135a), 2026-04-20
Supplement: d6lc00135a6.pdf [file d6lc00135a6.pdf]

## SUPPORTING INFORMATION

**Supplementary Table 1.** Current plasma separation devices for point-of-care applications. References indicated from main text.

| Study                                                       | Automated                                              | Large-volume processing<br>(≥ 2 mL) | Minimal dilution                                       | High plasma yield<br>(≥ 75%) |
|-------------------------------------------------------------|--------------------------------------------------------|-------------------------------------|--------------------------------------------------------|------------------------------|
| Liu et al. 2016<br>(36)                                     | -                                                      | -                                   | +                                                      | -                            |
|                                                             | Manual removal of plasma with micropipette             | 0.2 mL                              | No dilution                                            | ~70%                         |
| Liu et al. 2013<br>(37)                                     | -                                                      | -                                   | +                                                      | -                            |
|                                                             | Manual removal of plasma with micropipette             | 1.8 mL                              | No dilution                                            | ~34%                         |
| Su et al. 2020<br>(35)                                      | -                                                      | -                                   | +                                                      | +                            |
|                                                             | Manual removal of plasma with micropipette             | 0.4 mL                              | No dilution                                            | ~97%                         |
| Ayers/Victoriano et al. 2024<br>(our previous work)<br>(39) | -                                                      | -                                   | -                                                      | -                            |
|                                                             | Manual removal of plasma with syringe                  | 0.05 mL                             | 10x dilution                                           | ~40%                         |
| Victoriano et al. 2025 (our work)                           | +                                                      | +                                   | +                                                      | +                            |
|                                                             | Automated removal of plasma with mini peristaltic pump | 5 mL                                | 1.1x dilution<br>(Mixing with anti-RBC magnetic beads) | ~75-80%                      |



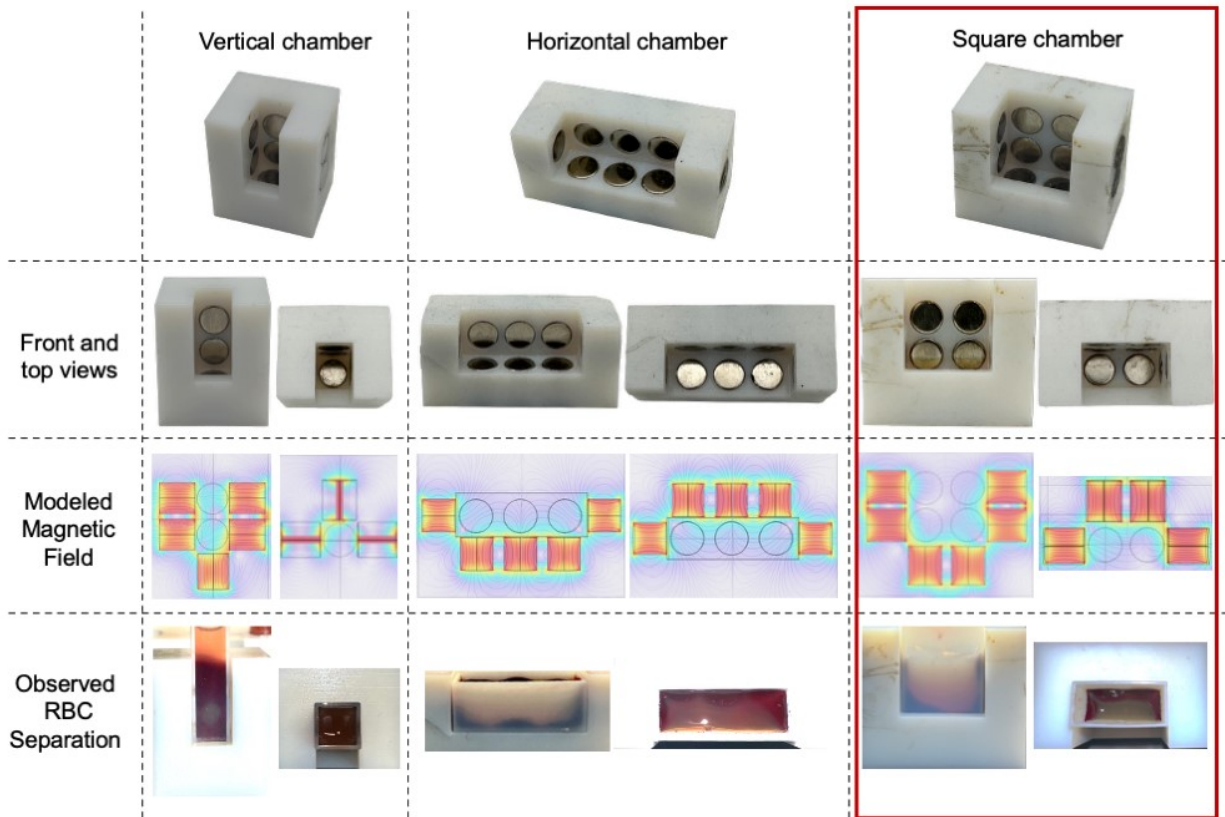

**Supplementary Figure 1. Magnetic field simulations compared to observed RBC separation for three magnetic separator prototypes.** Observed RBC separation correlated well spatially with magnetic field simulations across all prototypes. RBCs were drawn to areas of high magnetic field strength while RBC-depleted plasma accumulated in areas of low field strength.

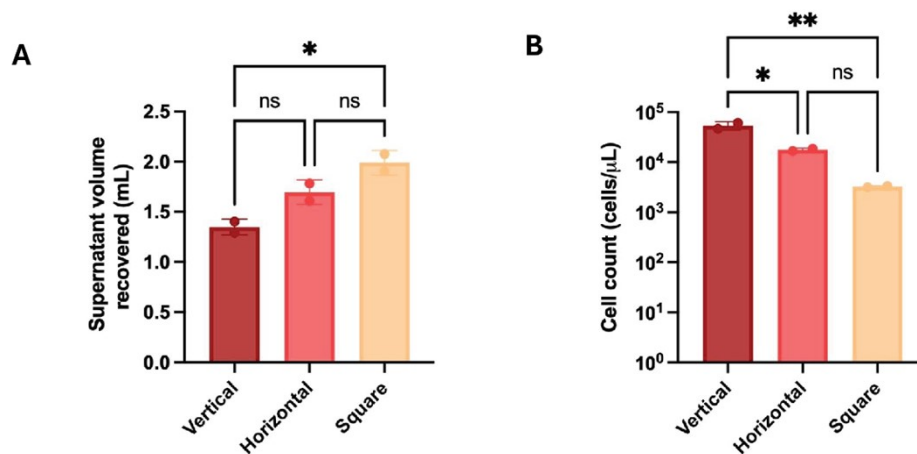

**Supplementary Figure 2. Quantitative analysis of RBC-depleted supernatant recovery and cell separation efficiency of magnetic separator prototypes. (A)** Volume yield of each magnetic separator prototype after 5 minutes of magnetic separation. Prototype #3 yielded an average of 1.990 mL of supernatant, compared to 1.696 mL and 1.348 mL for Prototypes #1 and #2, respectively. **(B)** Cell separation efficiency across magnetic separator prototypes. Prototype #3 yielded the lowest cell concentration in RBC-depleted supernatant, with 3,233 remaining cells/μL, compared to 53,417 and 17,624 cells/μL for Prototypes #1 and #2, respectively. Error bars in all figures indicate mean  $\pm$  standard deviation. \*\*\*\* $p < 0.0001$ , \*\*\* $p < 0.001$ , \*\* $p < 0.01$ , \* $p < 0.05$

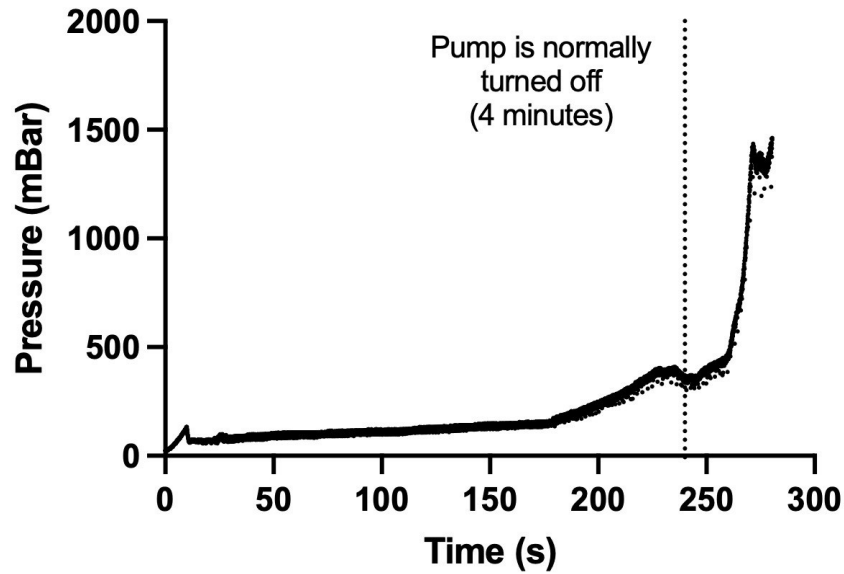

**Supplementary Figure 3. Transmembrane pressure buildup during filtration.** Transmembrane pressure was measured over time using a positive-pressure configuration at the operating flow rate. Pressure increased gradually during the initial phase of filtration, reaching ~340 mBar (~5 psi) at 4 minutes, corresponding to the standard operating endpoint. Beyond this point, pressure rose sharply to ~1400 mBar (~20 psi), consistent with progressive membrane fouling and eventual clogging due to red blood cell accumulation.

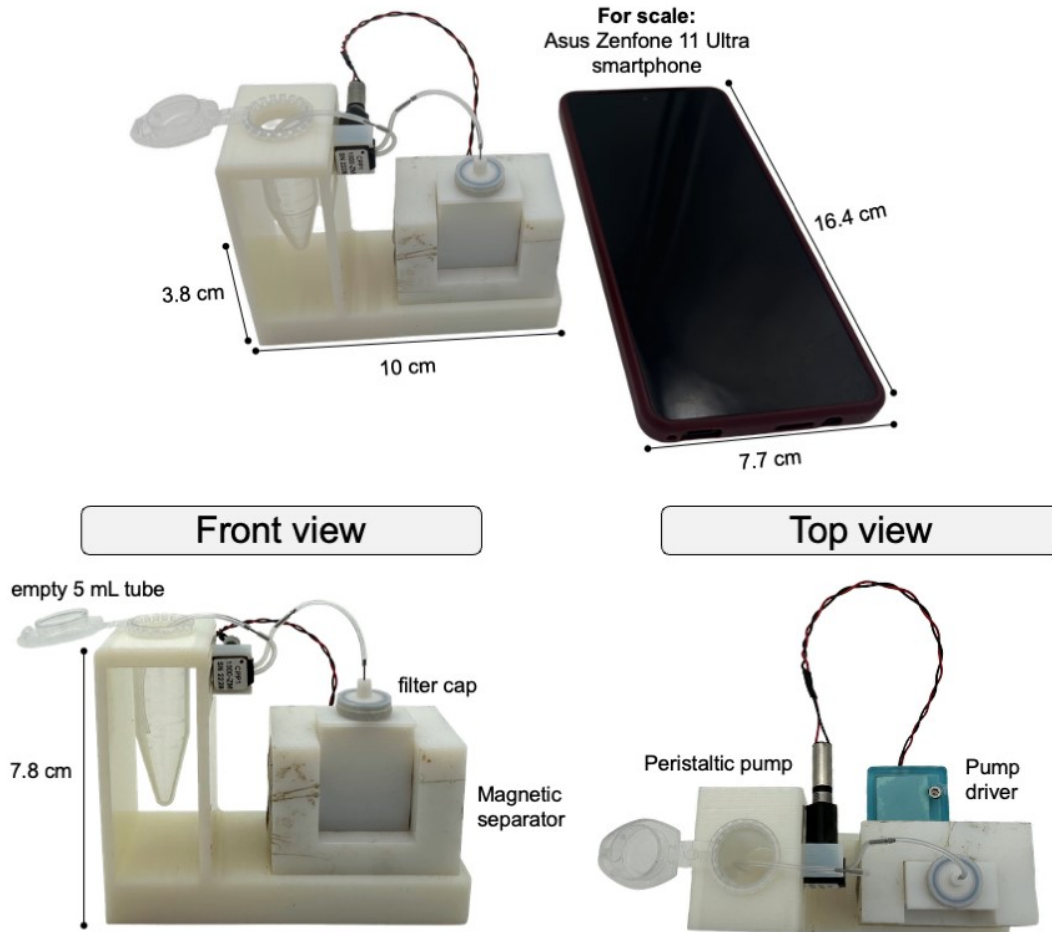

**Supplementary Figure 4. Additional views of the core components of PlasmaLIFT system.** Front and top views of PlasmaLIFT setup are shown, along with comparison to a smartphone (Asus Zenfone 11 Ultra) for scale.

## Supplementary Materials and Methods

### Projected Per-Sample Cost of Immunomagnetic RBC Depletion at Manufacturing Scale

To estimate the reagent cost of immunomagnetic red blood cell (RBC) depletion at manufacturing scale, we modeled a two-component system consisting of bulk carboxyl-functionalized magnetic beads covalently conjugated to anti-Glycophorin A (anti-CD235a) monoclonal antibody via EDC/NHS carbodiimide chemistry. All estimates apply to a 5 mL whole blood input volume. First, to estimate bead mass per sample, we estimate a working concentration of 10 mg/mL for 500  $\mu$ L of bead suspension, consistent with published immunomagnetic cell depletion protocols<sup>1</sup>, which yields an applied bead mass of ~5 mg per sample.

Next, we estimate cost of antibody conjugation. Carboxyl beads are activated with 1-ethyl-3-(3-dimethylaminopropyl)carbodiimide (EDC) and N-hydroxysuccinimide (NHS), forming stable covalent amide bonds between bead surface carboxyl groups and primary amines on anti-GlyA antibody<sup>2</sup>. EDC and NHS are commodity reagents (~\$0.01/reaction) and are not a meaningful cost driver. At a loading density of 30  $\mu$ g antibody per mg beads and 50% saturation, the effective antibody requirement is ~75  $\mu$ g per sample. Non-biotinylated anti-GlyA monoclonal antibody at OEM scale is estimated at \$5-15/mg<sup>3,6</sup>.

Using the EDC/NHS attachment chemistry, carboxyl magnetic beads are available from multiple suppliers at substantially lower list prices than premium IVD-grade formats. Advanced BioChemicals (Lawrenceville, GA) lists carboxyl magnetic beads at \$745 per gram (20 mL at 50 mg/mL; Cat. #MBFB-04001)<sup>4</sup>, which serves as the research-scale reference price. OEM bulk procurement contracts in the diagnostic reagent industry are typically subject to discounts of 10-90% relative to list price<sup>3,5</sup>; applying a 90% discount yields an estimated OEM cost of ~\$75/g. At 5 mg per sample, the bead cost is approximately \$0.38. The Anti-GlyA antibody is estimated to cost \$10/mg at the OEM scale<sup>3,6</sup>. Table S1 estimates the total cost per sample at ~\$1.19, although we note precise per-sample costs depend on titration optimization and supplier negotiation.

**Supplementary Table 2.** Estimated per-sample material cost for immunomagnetic RBC depletion using carboxyl bead/EDC-NHS chemistry at OEM scale (5 mL whole blood).

| Component                                      | Qty / 5 mL sample | Estimated cost |
|------------------------------------------------|-------------------|----------------|
| Carboxyl magnetic beads (~\$75/g OEM est.)     | 5 mg              | \$0.38         |
| Anti-GlyA mAb, unconjugated (\$10/mg OEM est.) | ~75 $\mu$ g       | \$0.75         |
| EDC/NHS crosslinker (amortized)                | —                 | \$0.01         |
| Buffer / excipients (PBS, MES, BSA)            | —                 | \$0.05         |
| Total per sample                               | —                 | ~\$1.19        |

## References for Supporting Information

1. Majonis D, et al. Assessment of streptavidin bead binding capacity to improve quality of streptavidin-based enrichment studies. *J Proteome Res.* 2021;20(5):2695–2704. doi:10.1021/acs.jproteome.0c00956
2. Hermanson GT. *Bioconjugate Techniques*. 3rd ed. Academic Press; 2013.
3. Desai NR, et al. An approach to include the cost of consumables in biochemistry analyzer procurement on the reagent rental model alleviates hidden expenses. *J Lab Physicians.* 2024; PMC11536279.
4. Advanced BioChemicals. Carboxyl Magnetic Beads (Cat. #MBFB-04001). 20 mL at 50 mg/mL; list price \$745.00/g. [advancedbiochemicals.com](https://www.advancedbiochemicals.com) (accessed 2026).
5. Vogler S, et al. Comparative price analysis of biological medicines: disparities generated by different pricing policies. *Front Pharmacol.* 2023;14:1256542. doi:10.3389/fphar.2023.125654
