# Supplementary figures and images for: Centrifuge-free separation of plasma from milliliters of whole blood for point-of-care diagnostics
Source: Royal Society of Chemistry journal article supplement (doi:10.1039/d6lc00135a), 2026-04-20

**A**

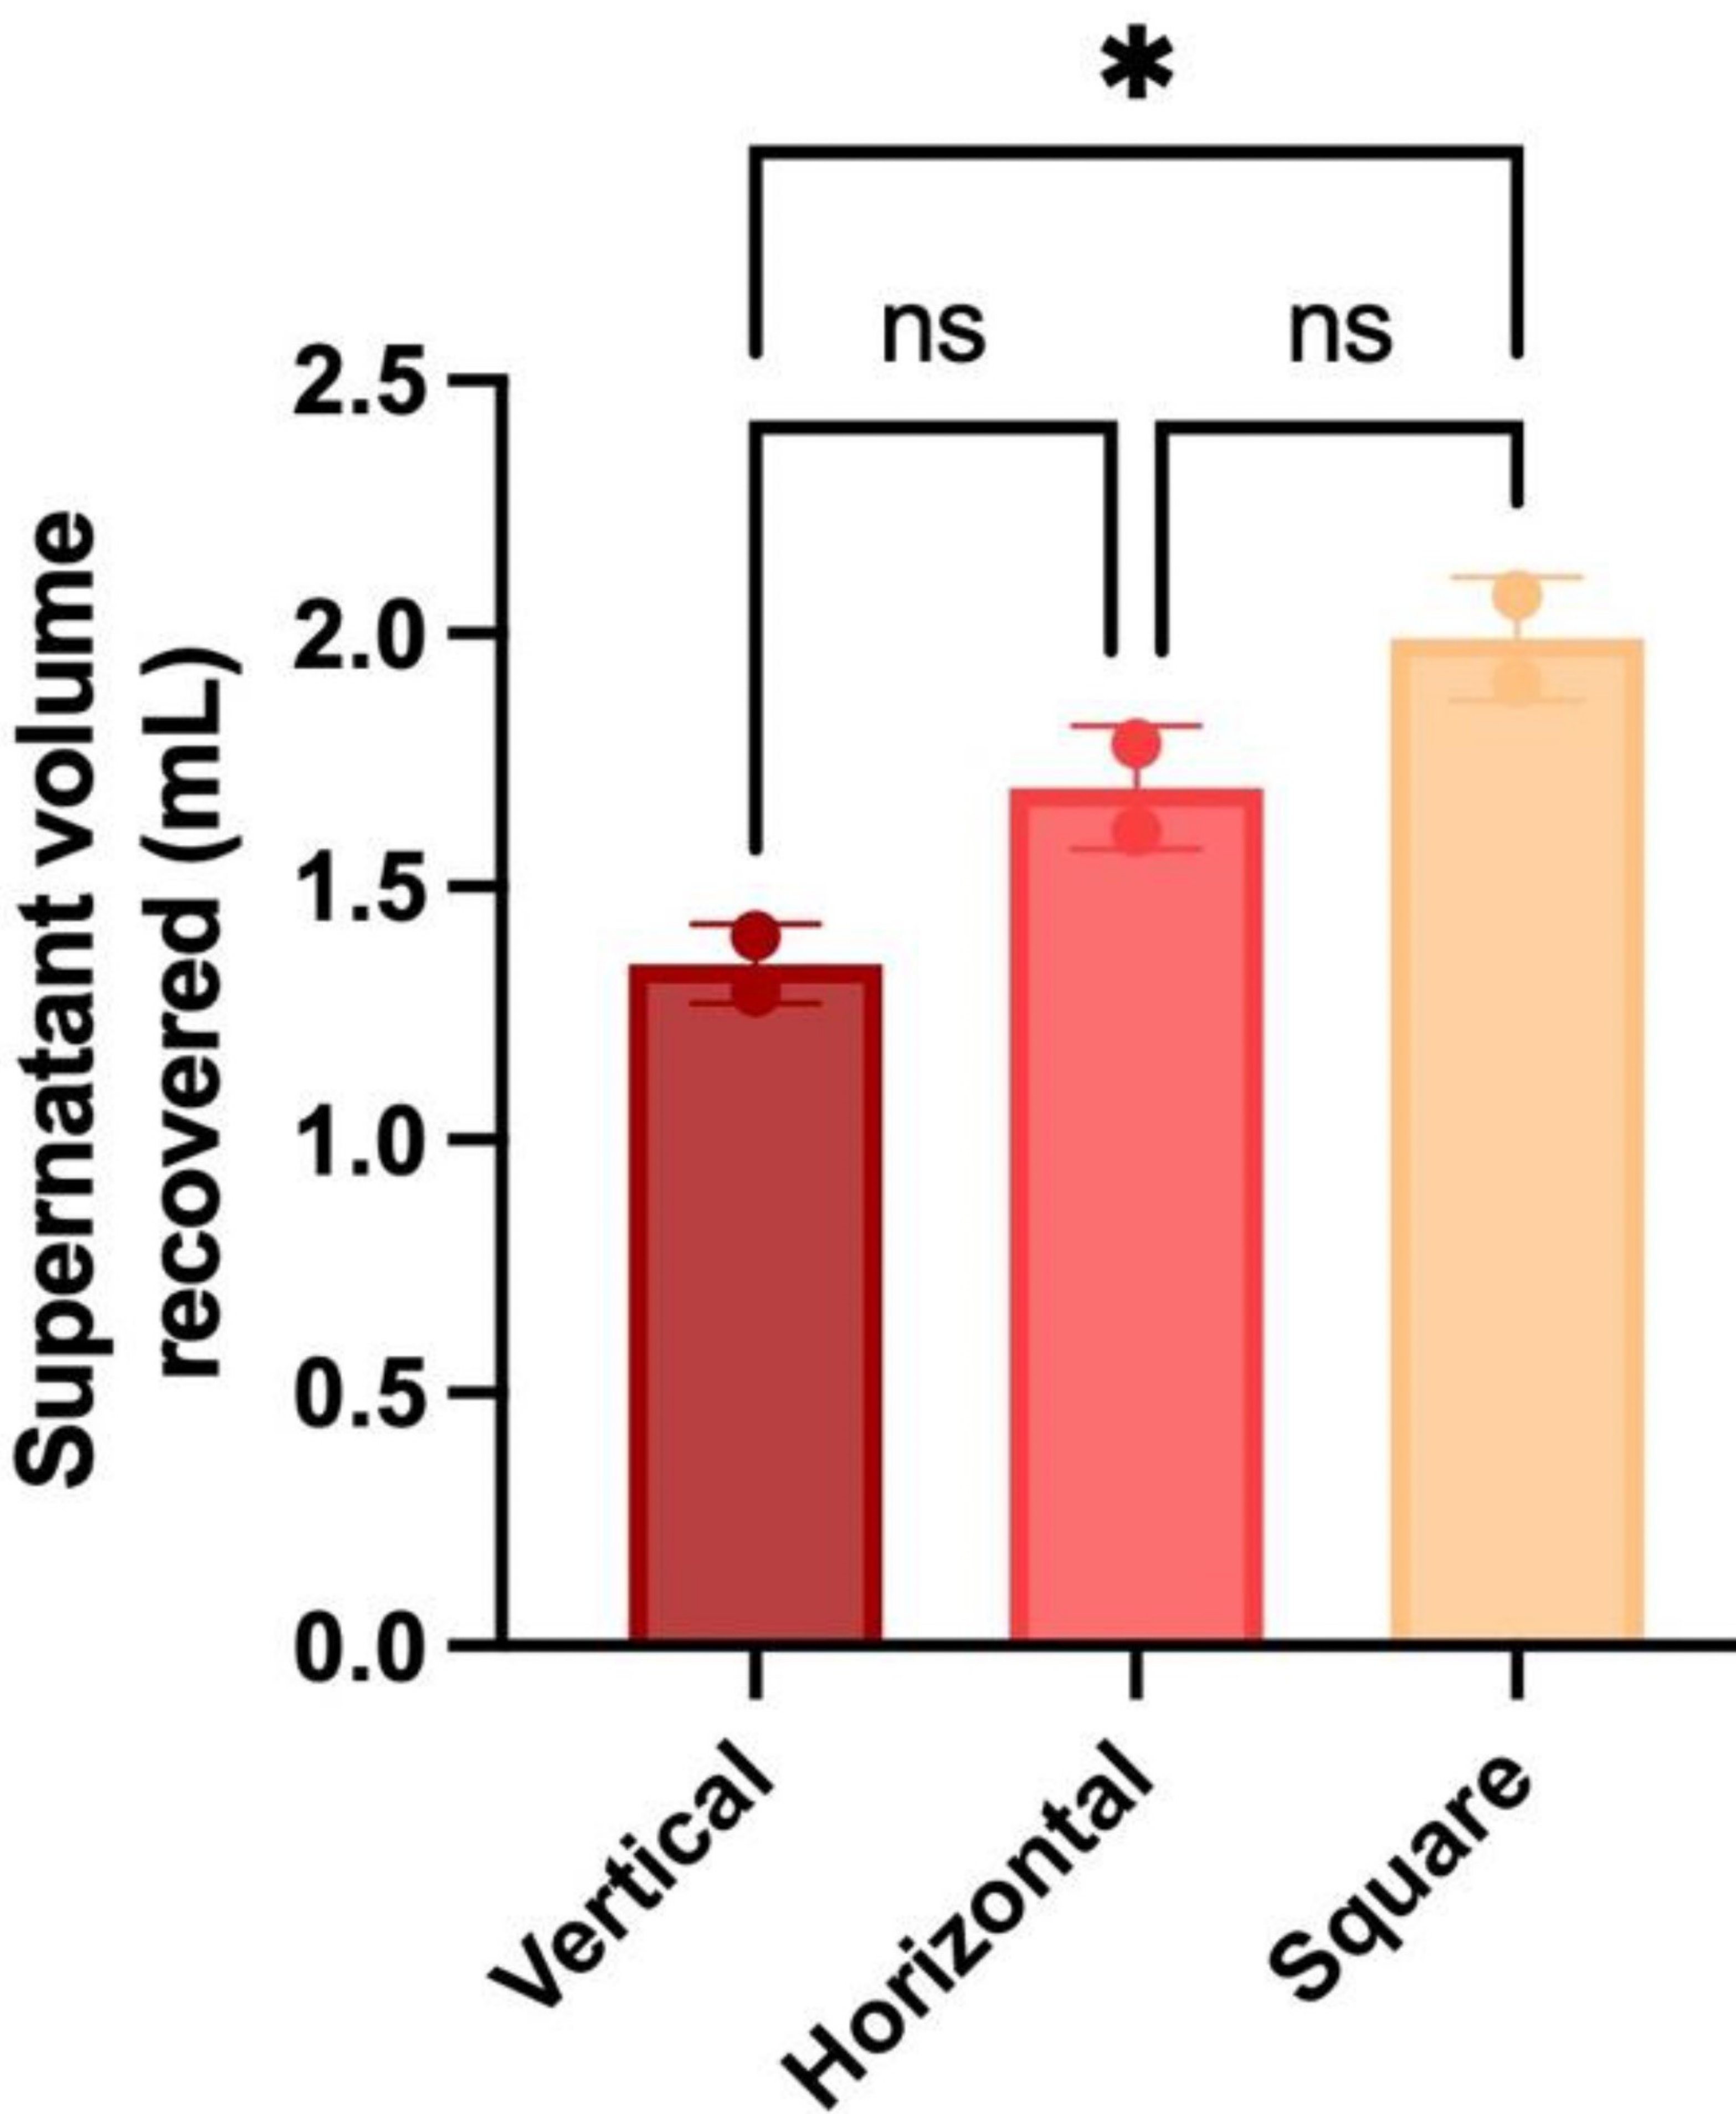

**B**

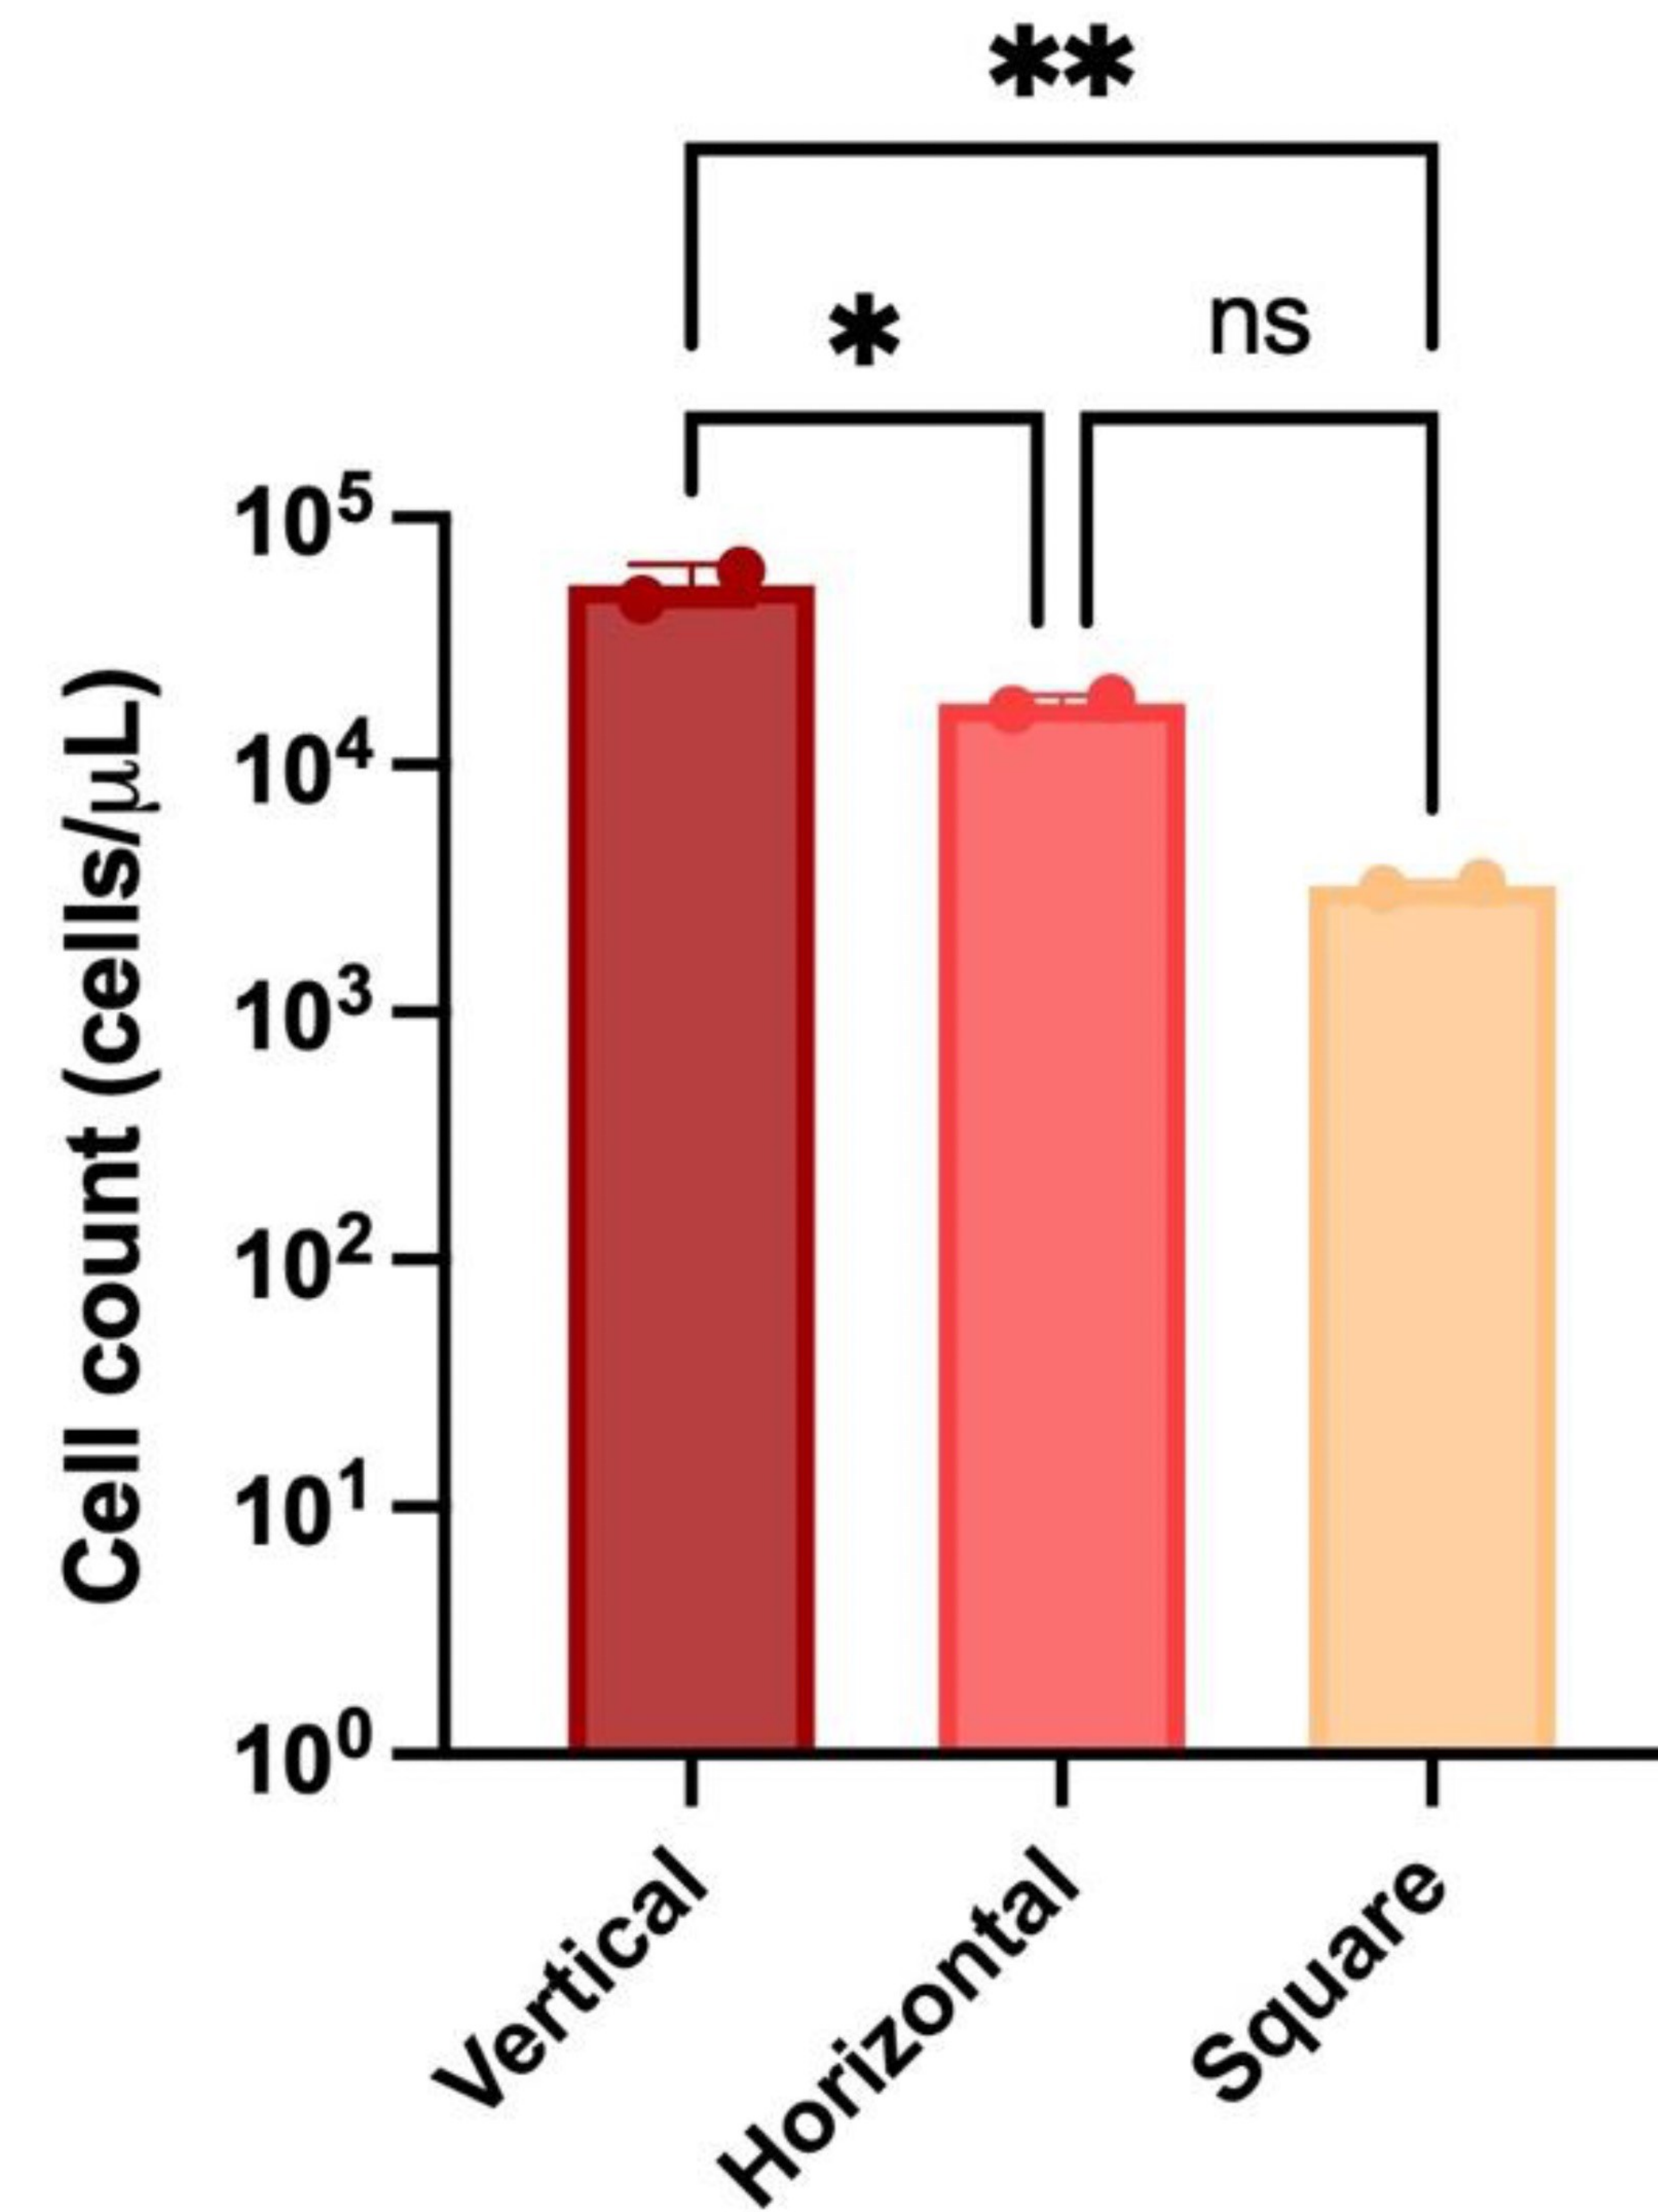

Supplement: d6lc00135a3.pdf [file d6lc00135a3.pdf]

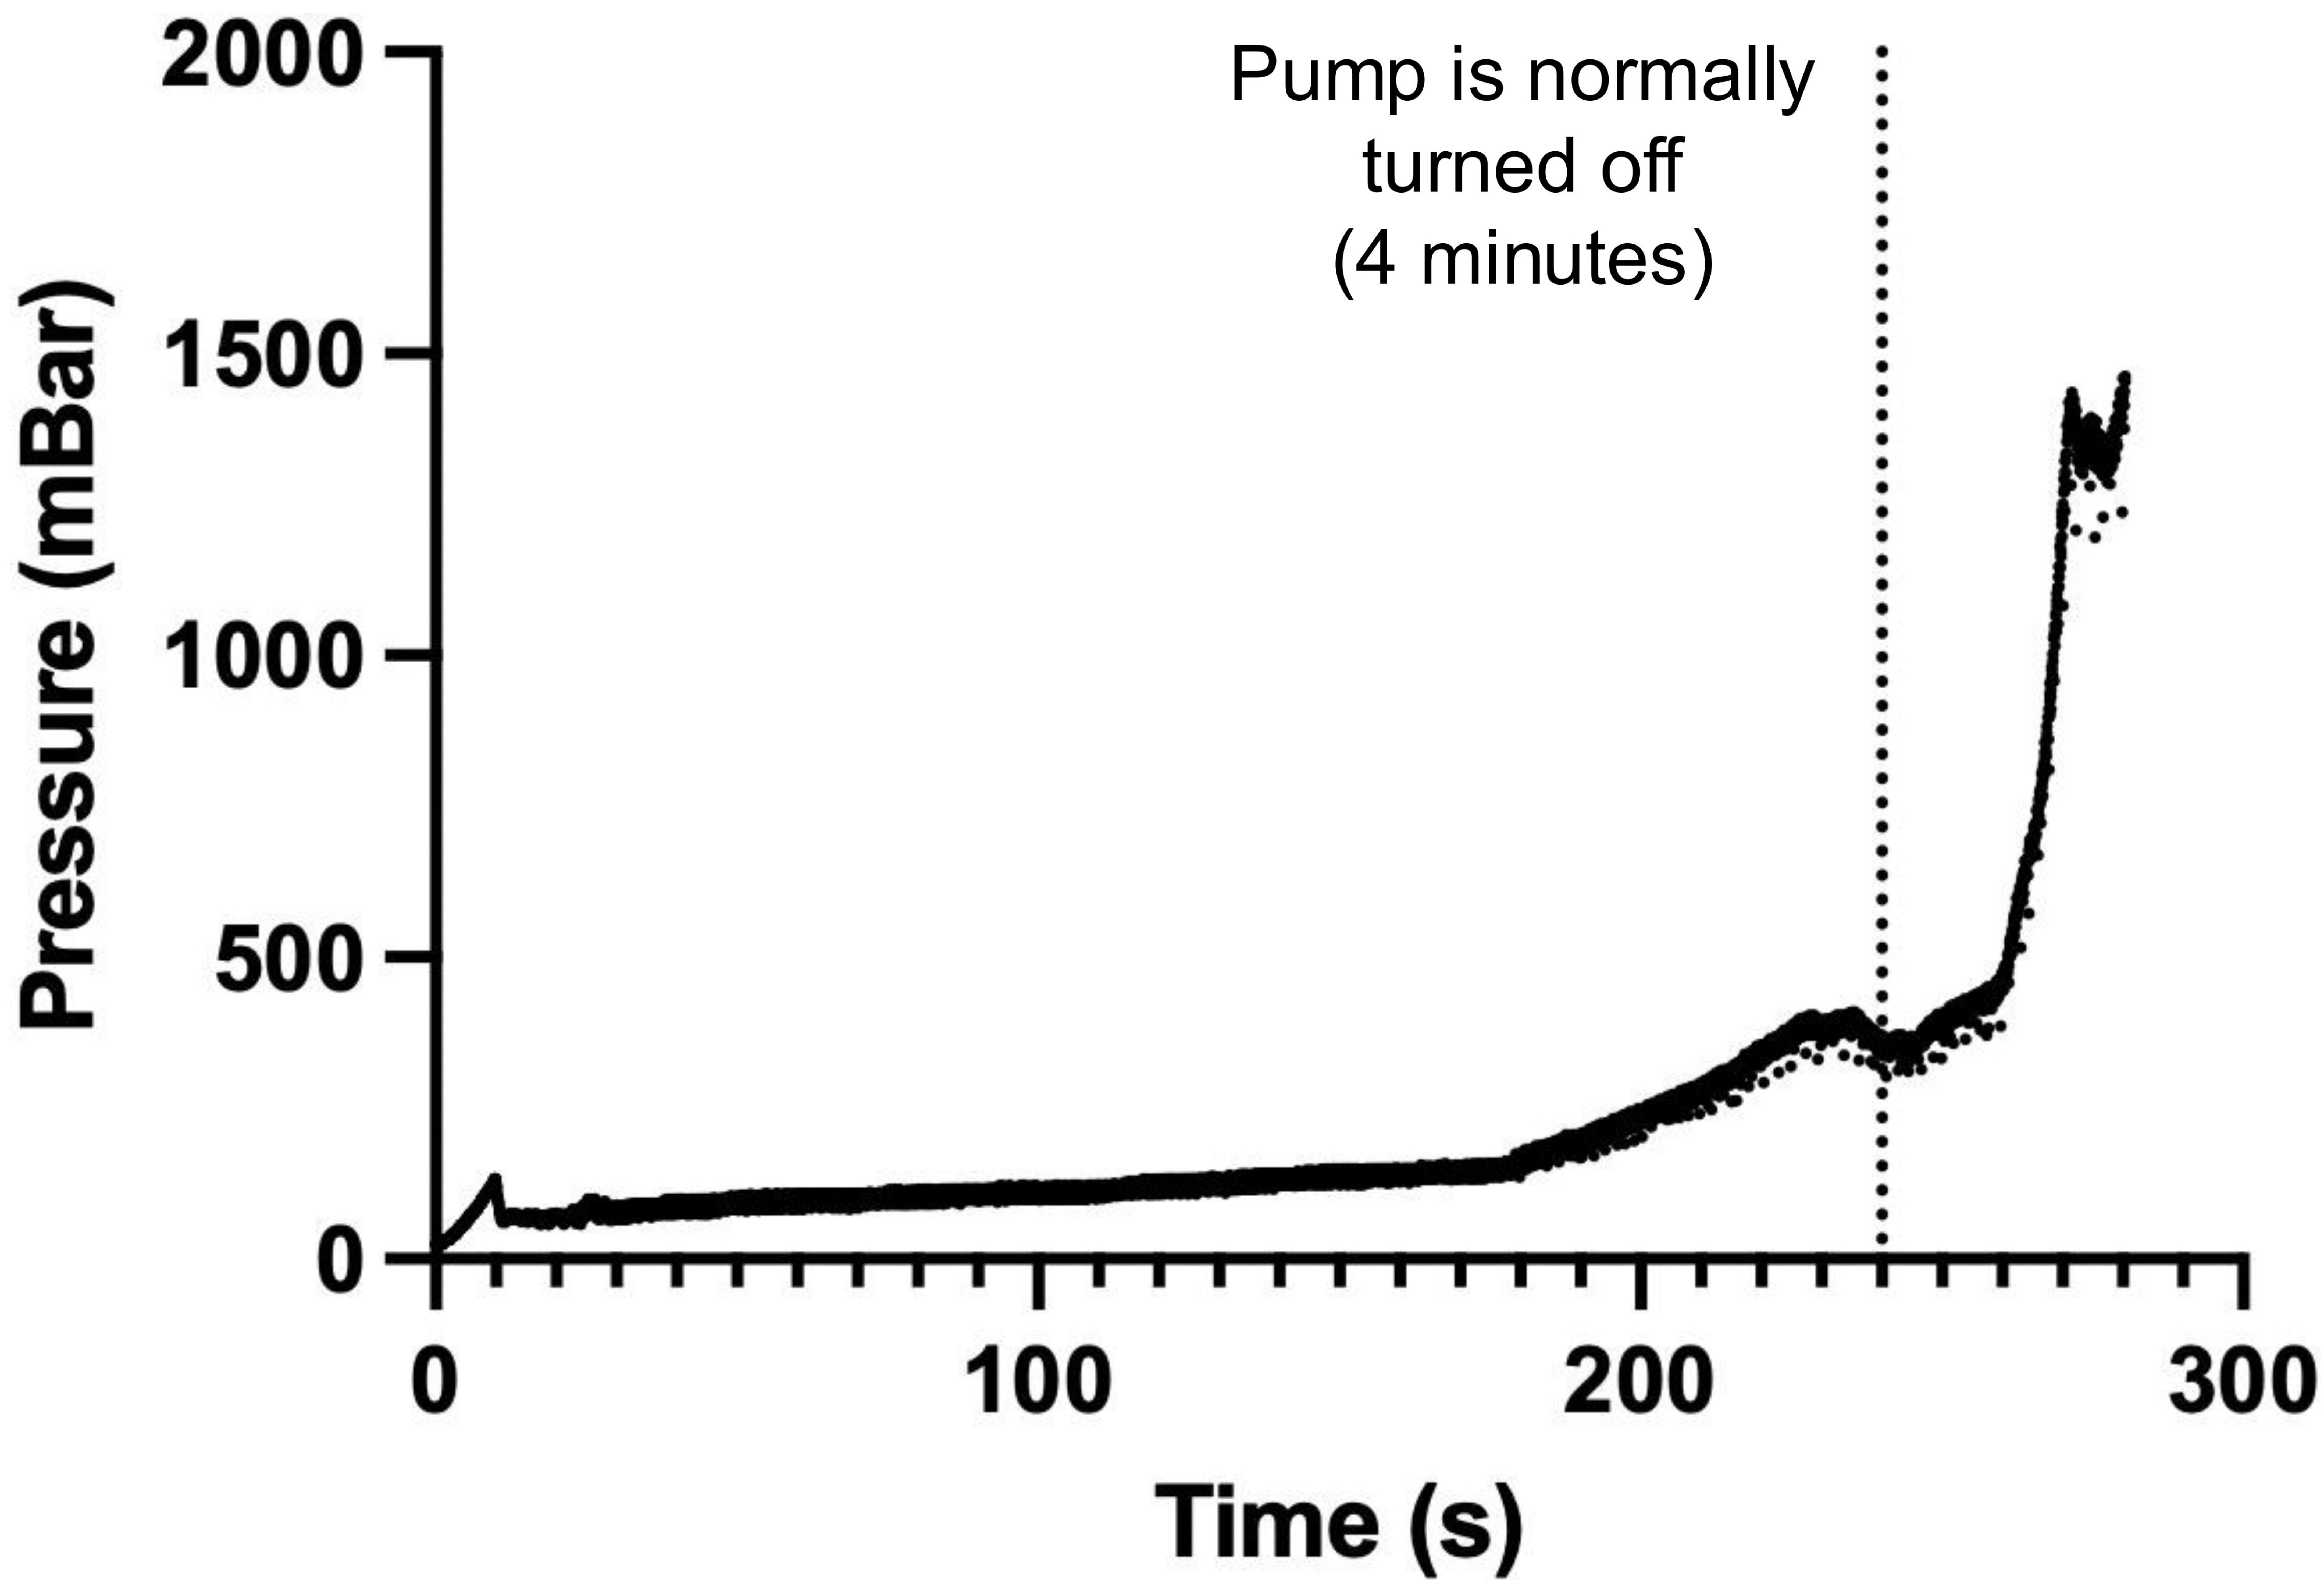

Supplement: d6lc00135a4.pdf [file d6lc00135a4.pdf]

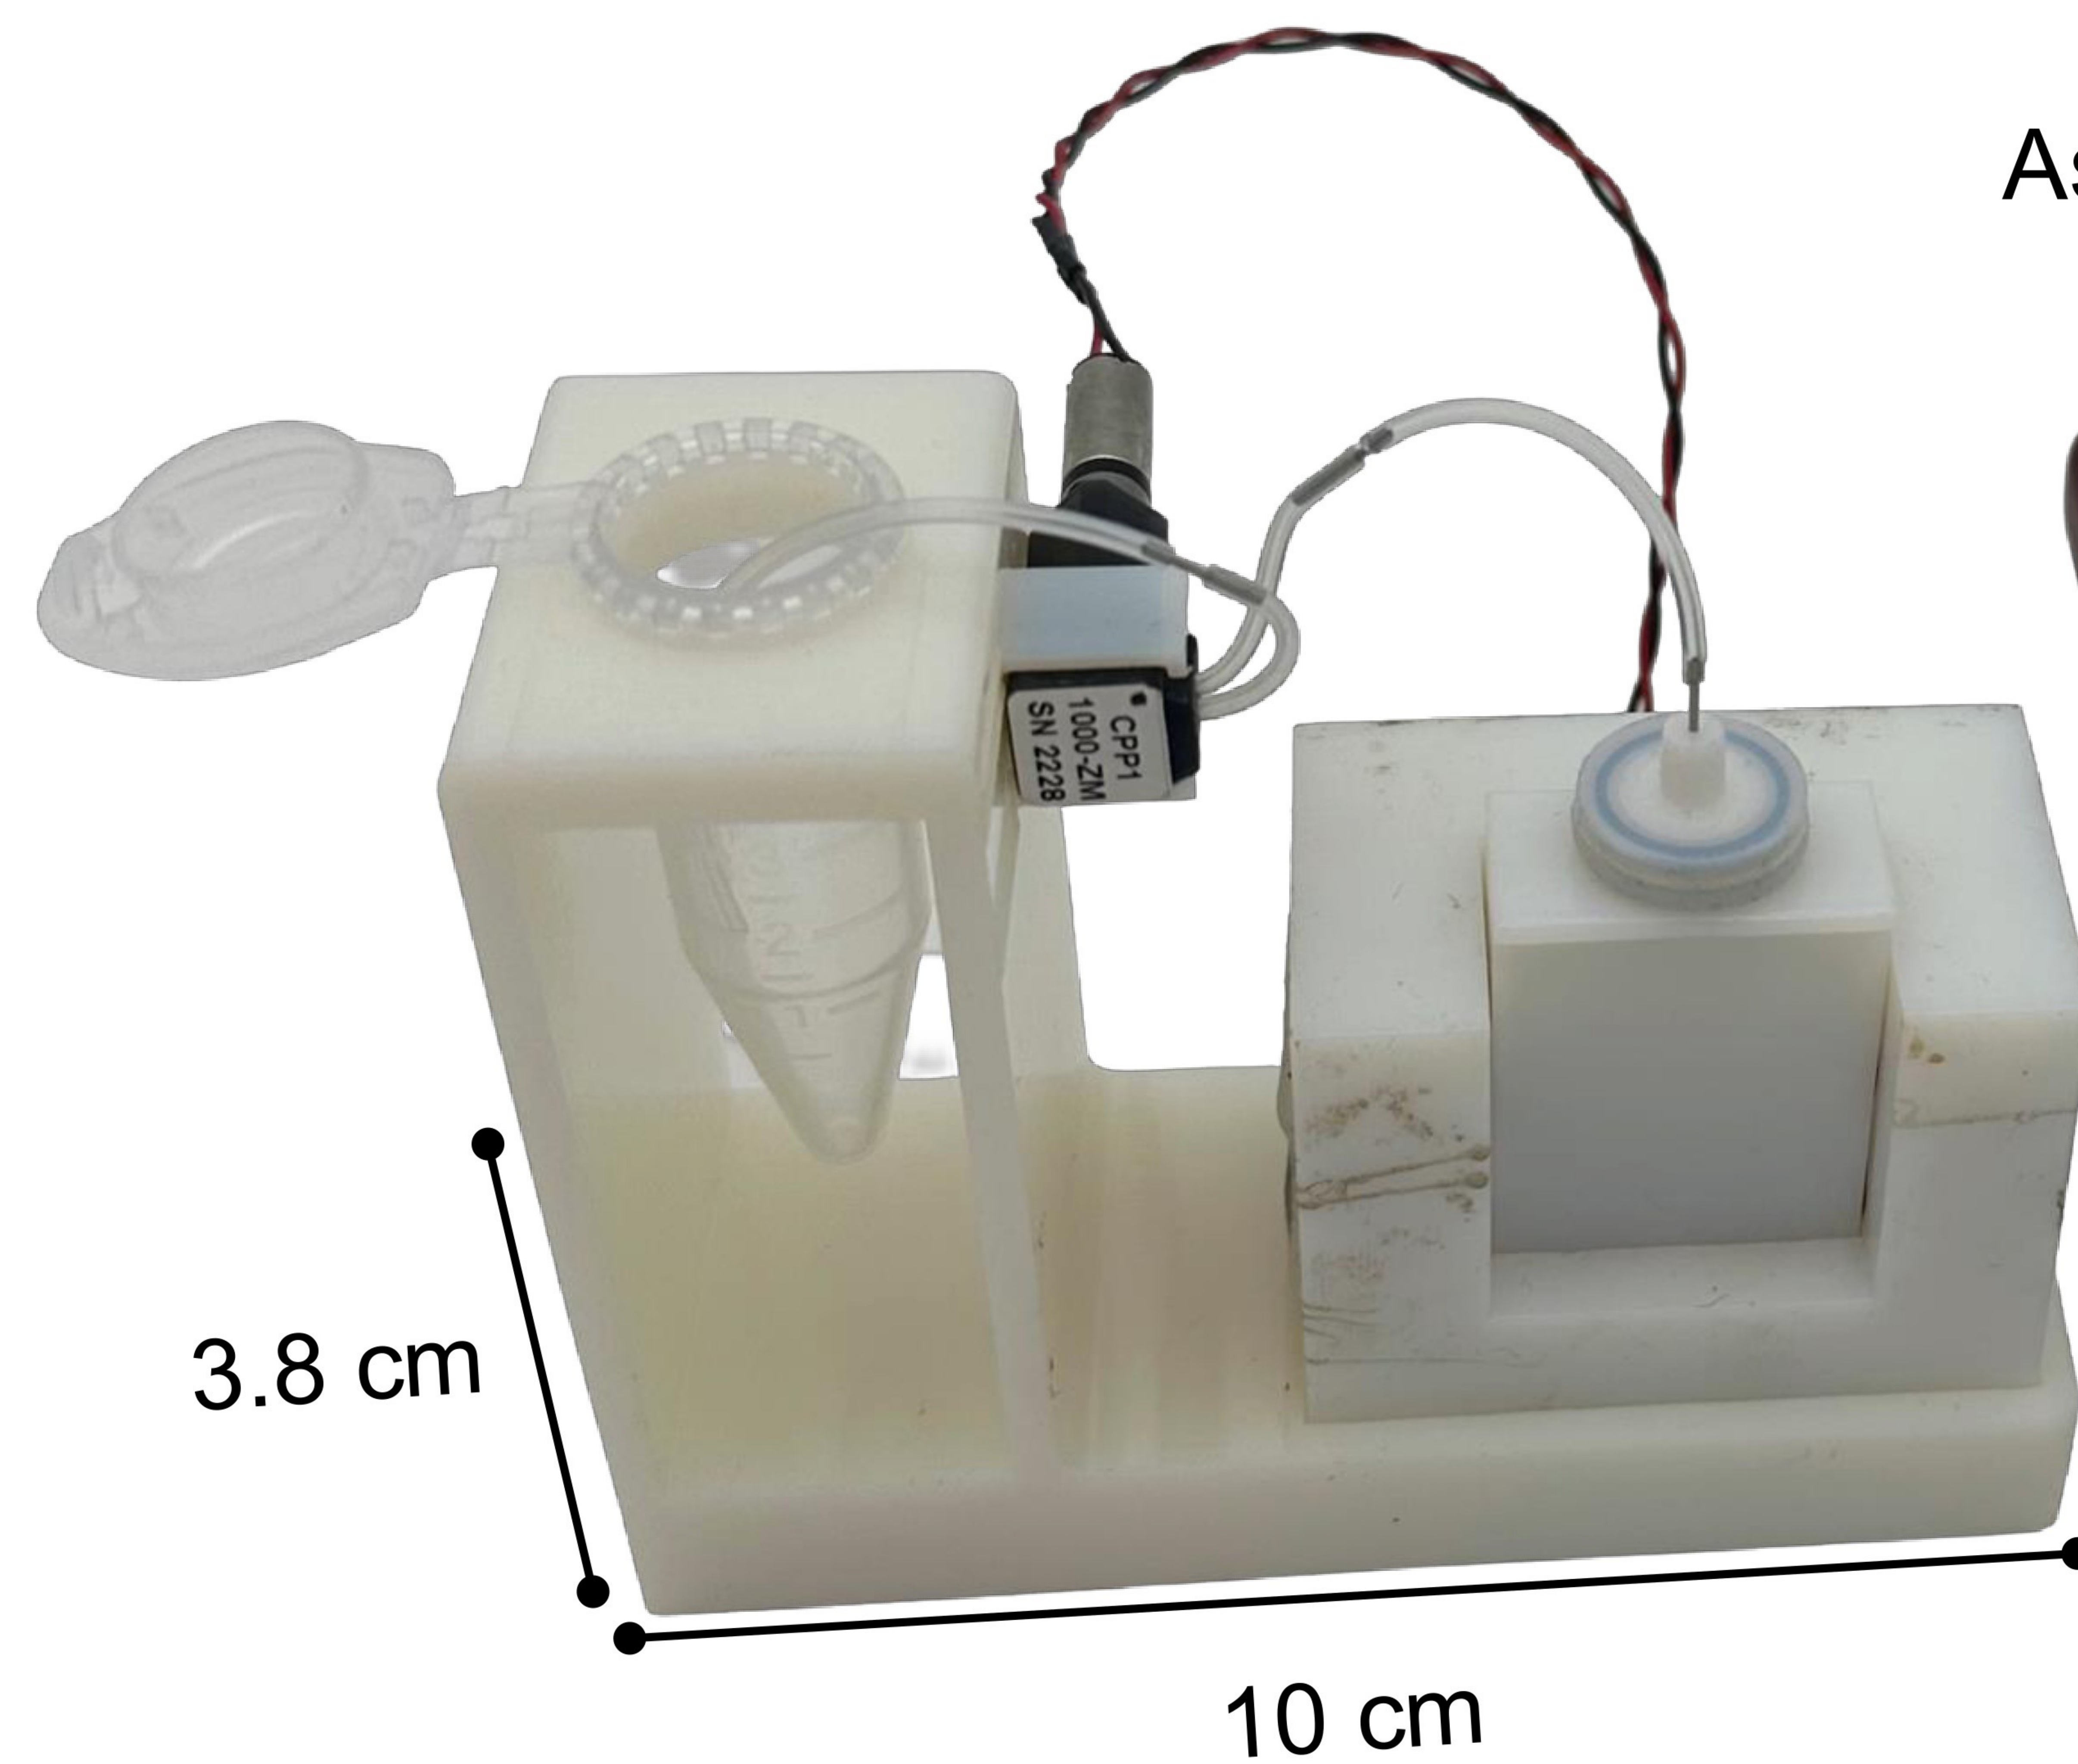

Front view

**For scale:**  
Asus Zenfone 11 Ultra  
smartphone

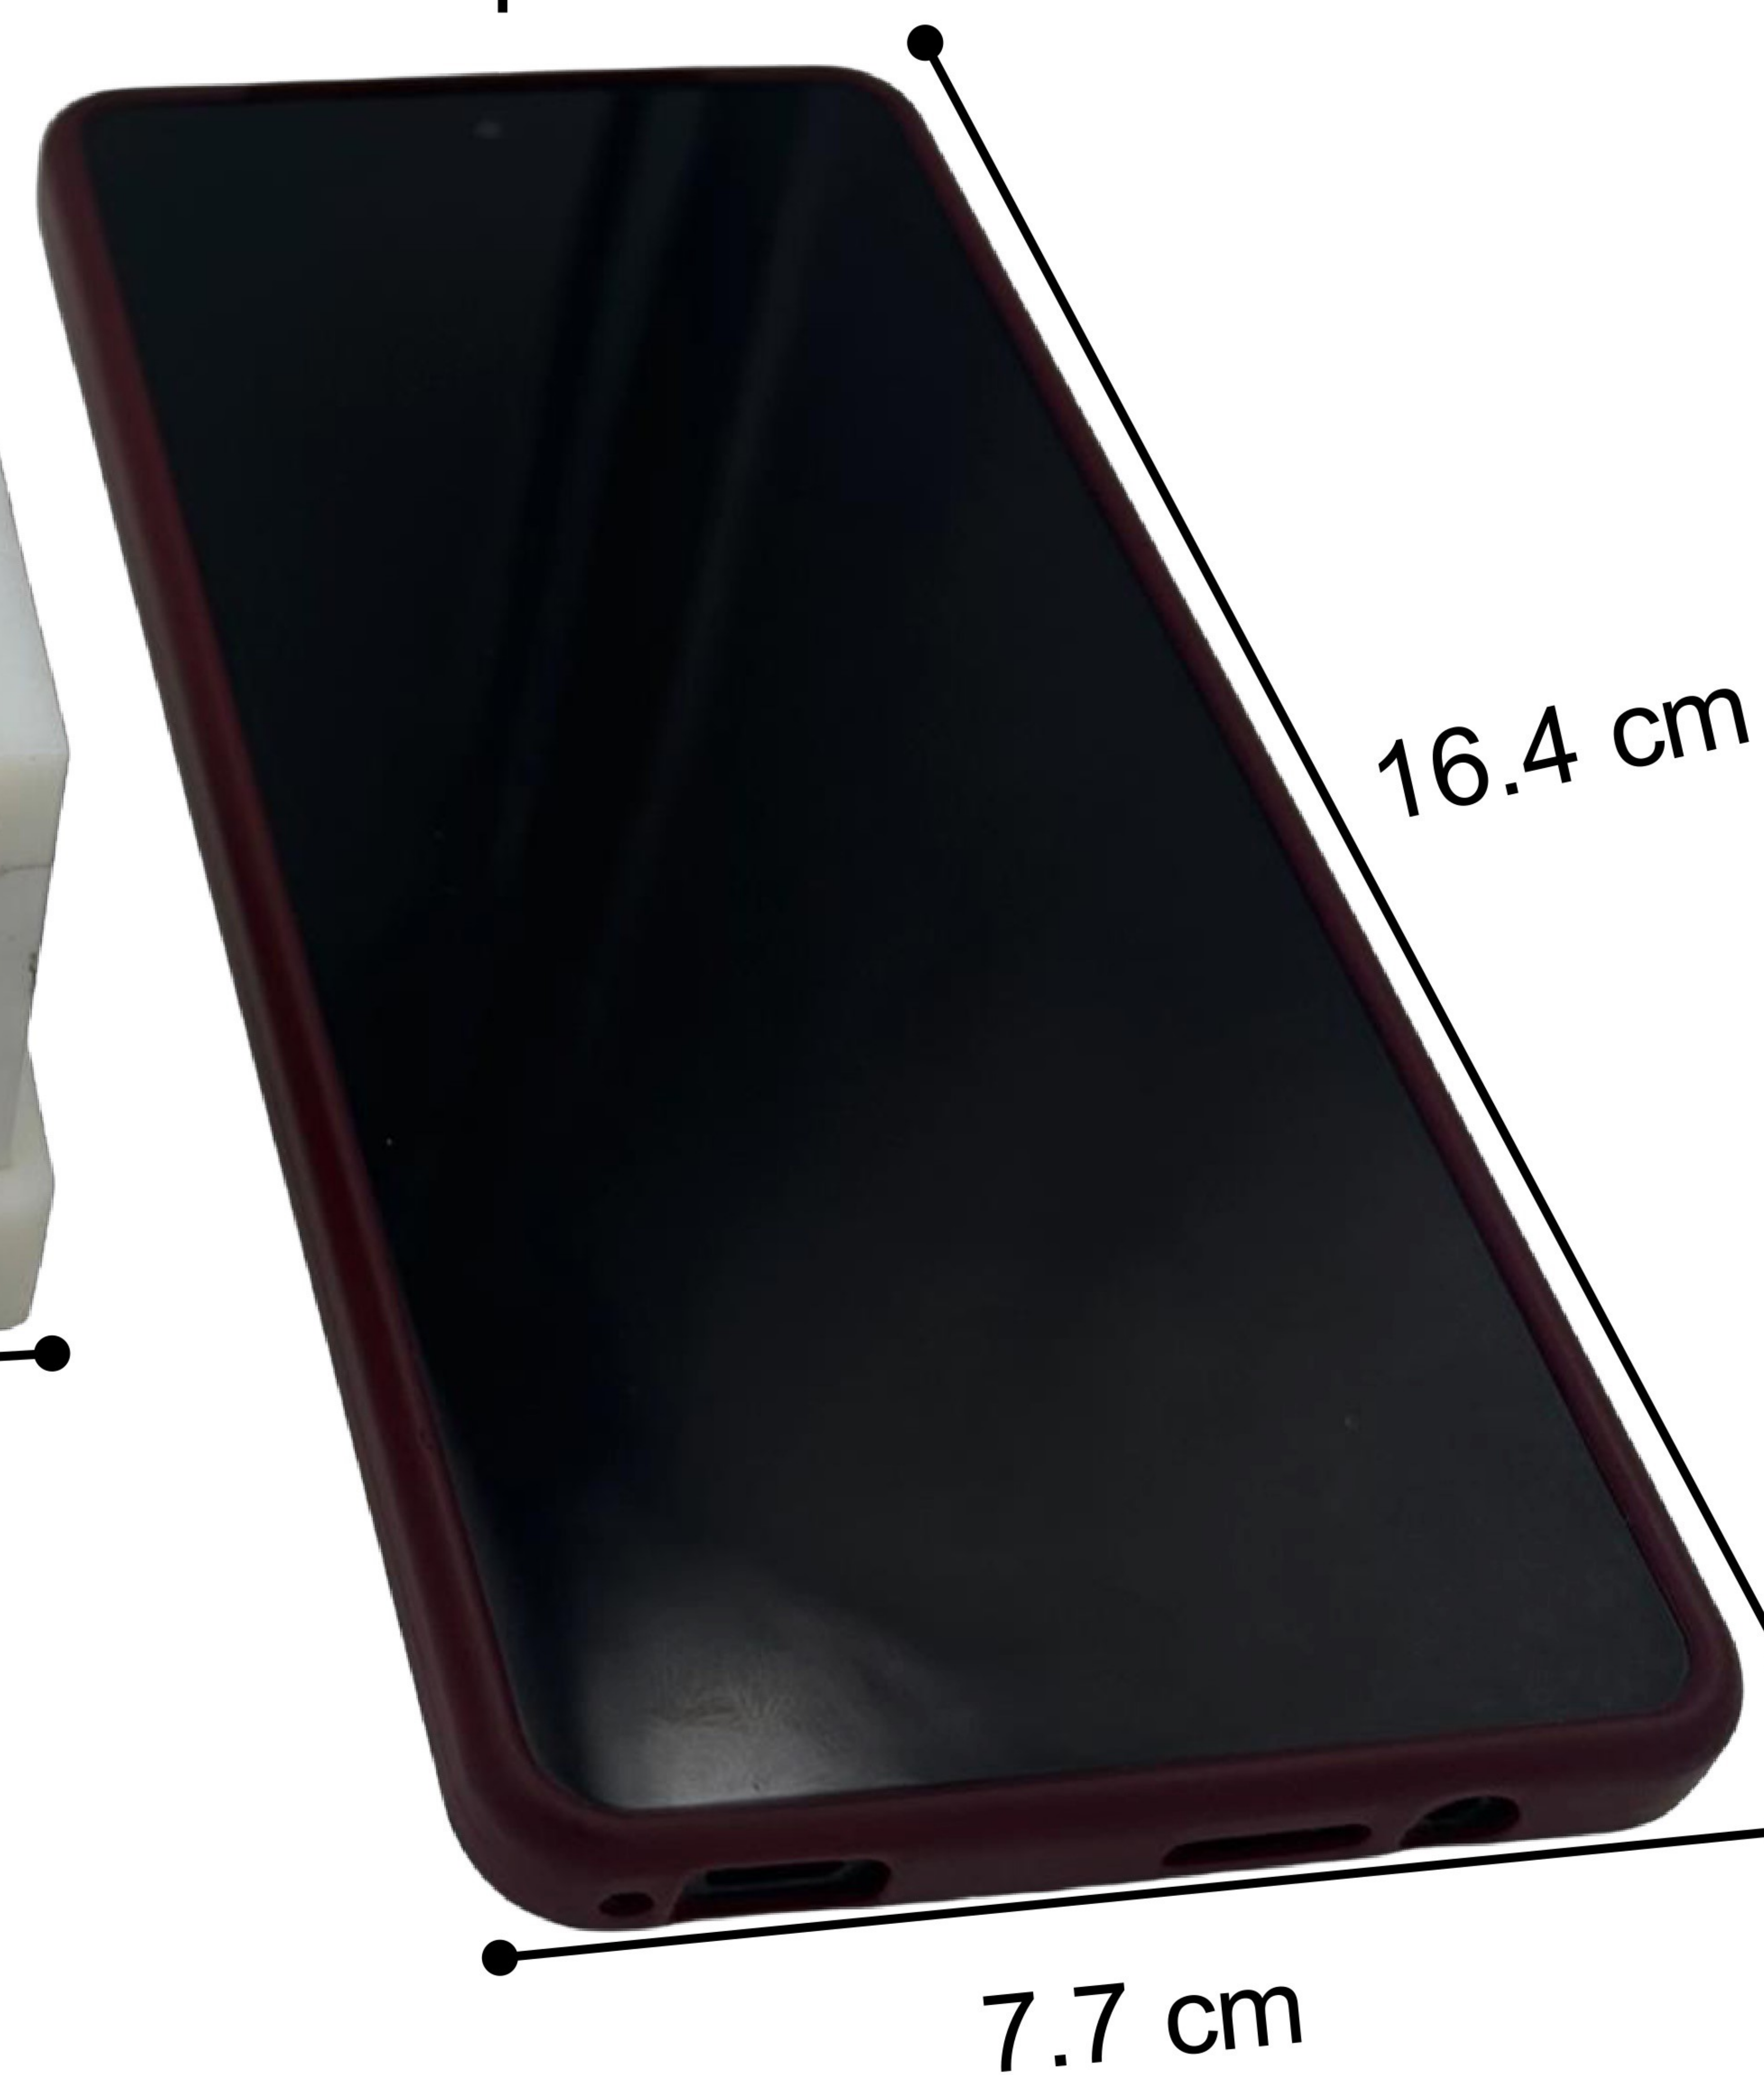

Top view

empty 5 mL tube

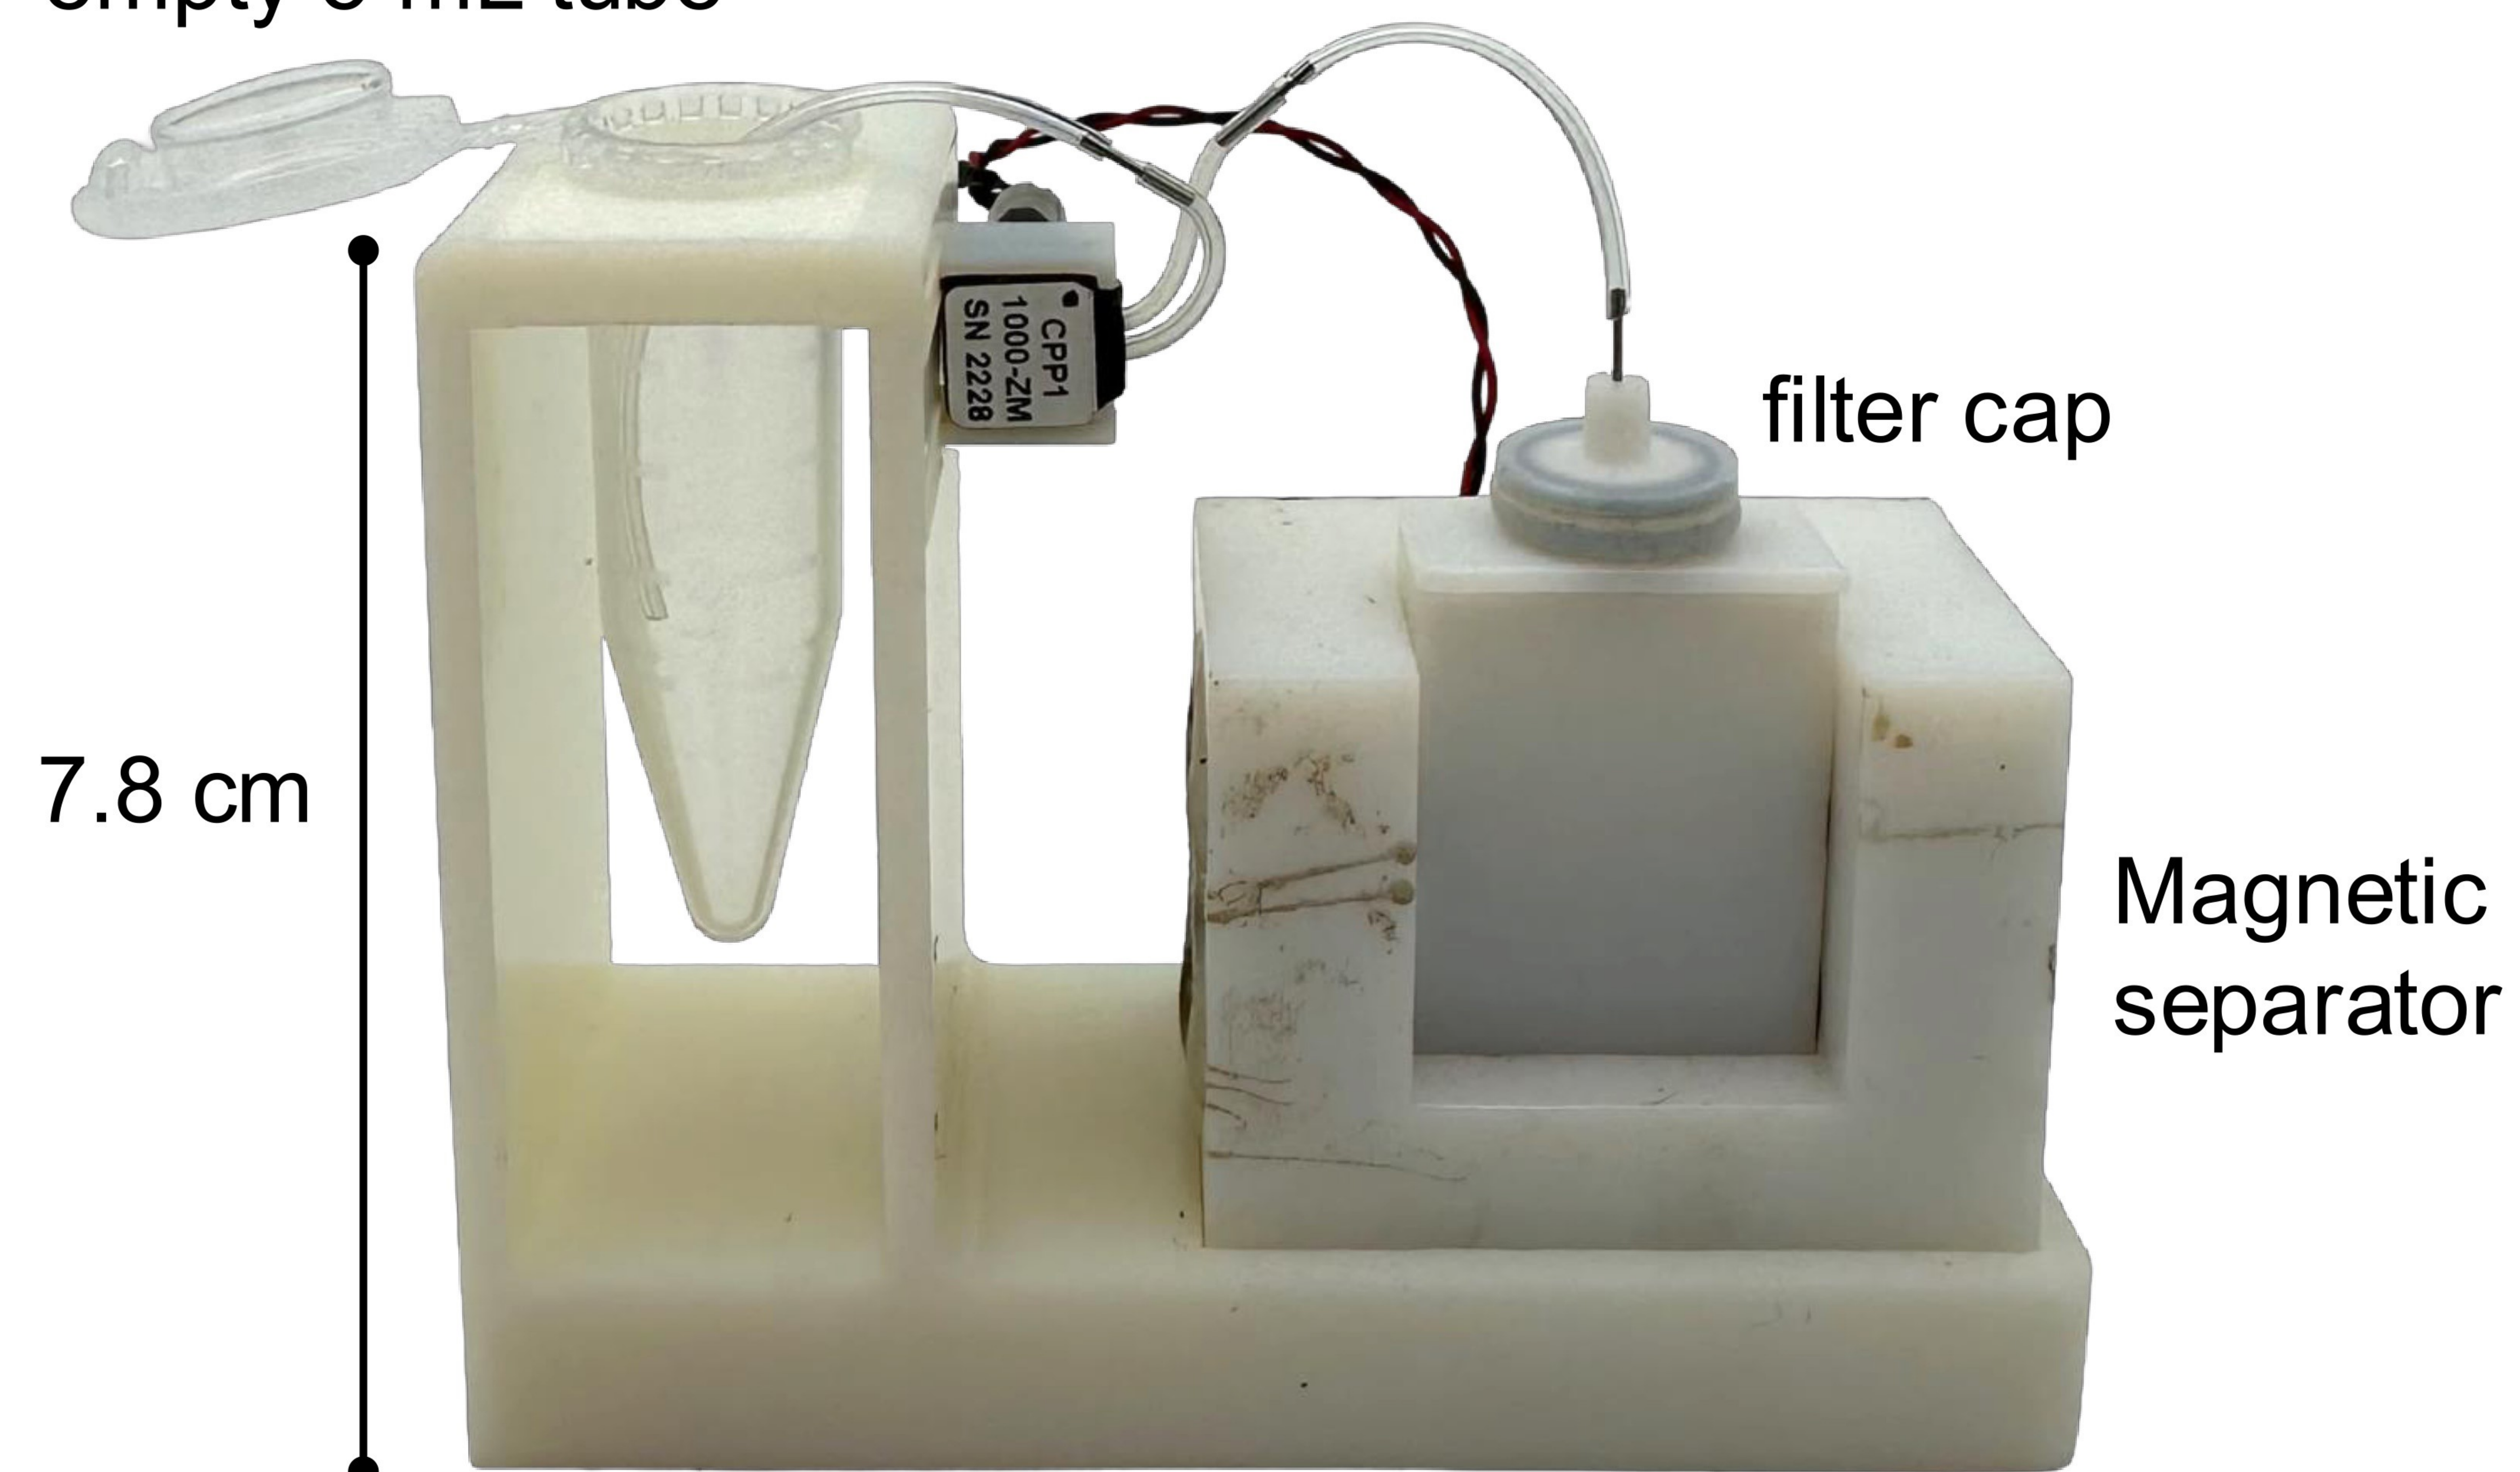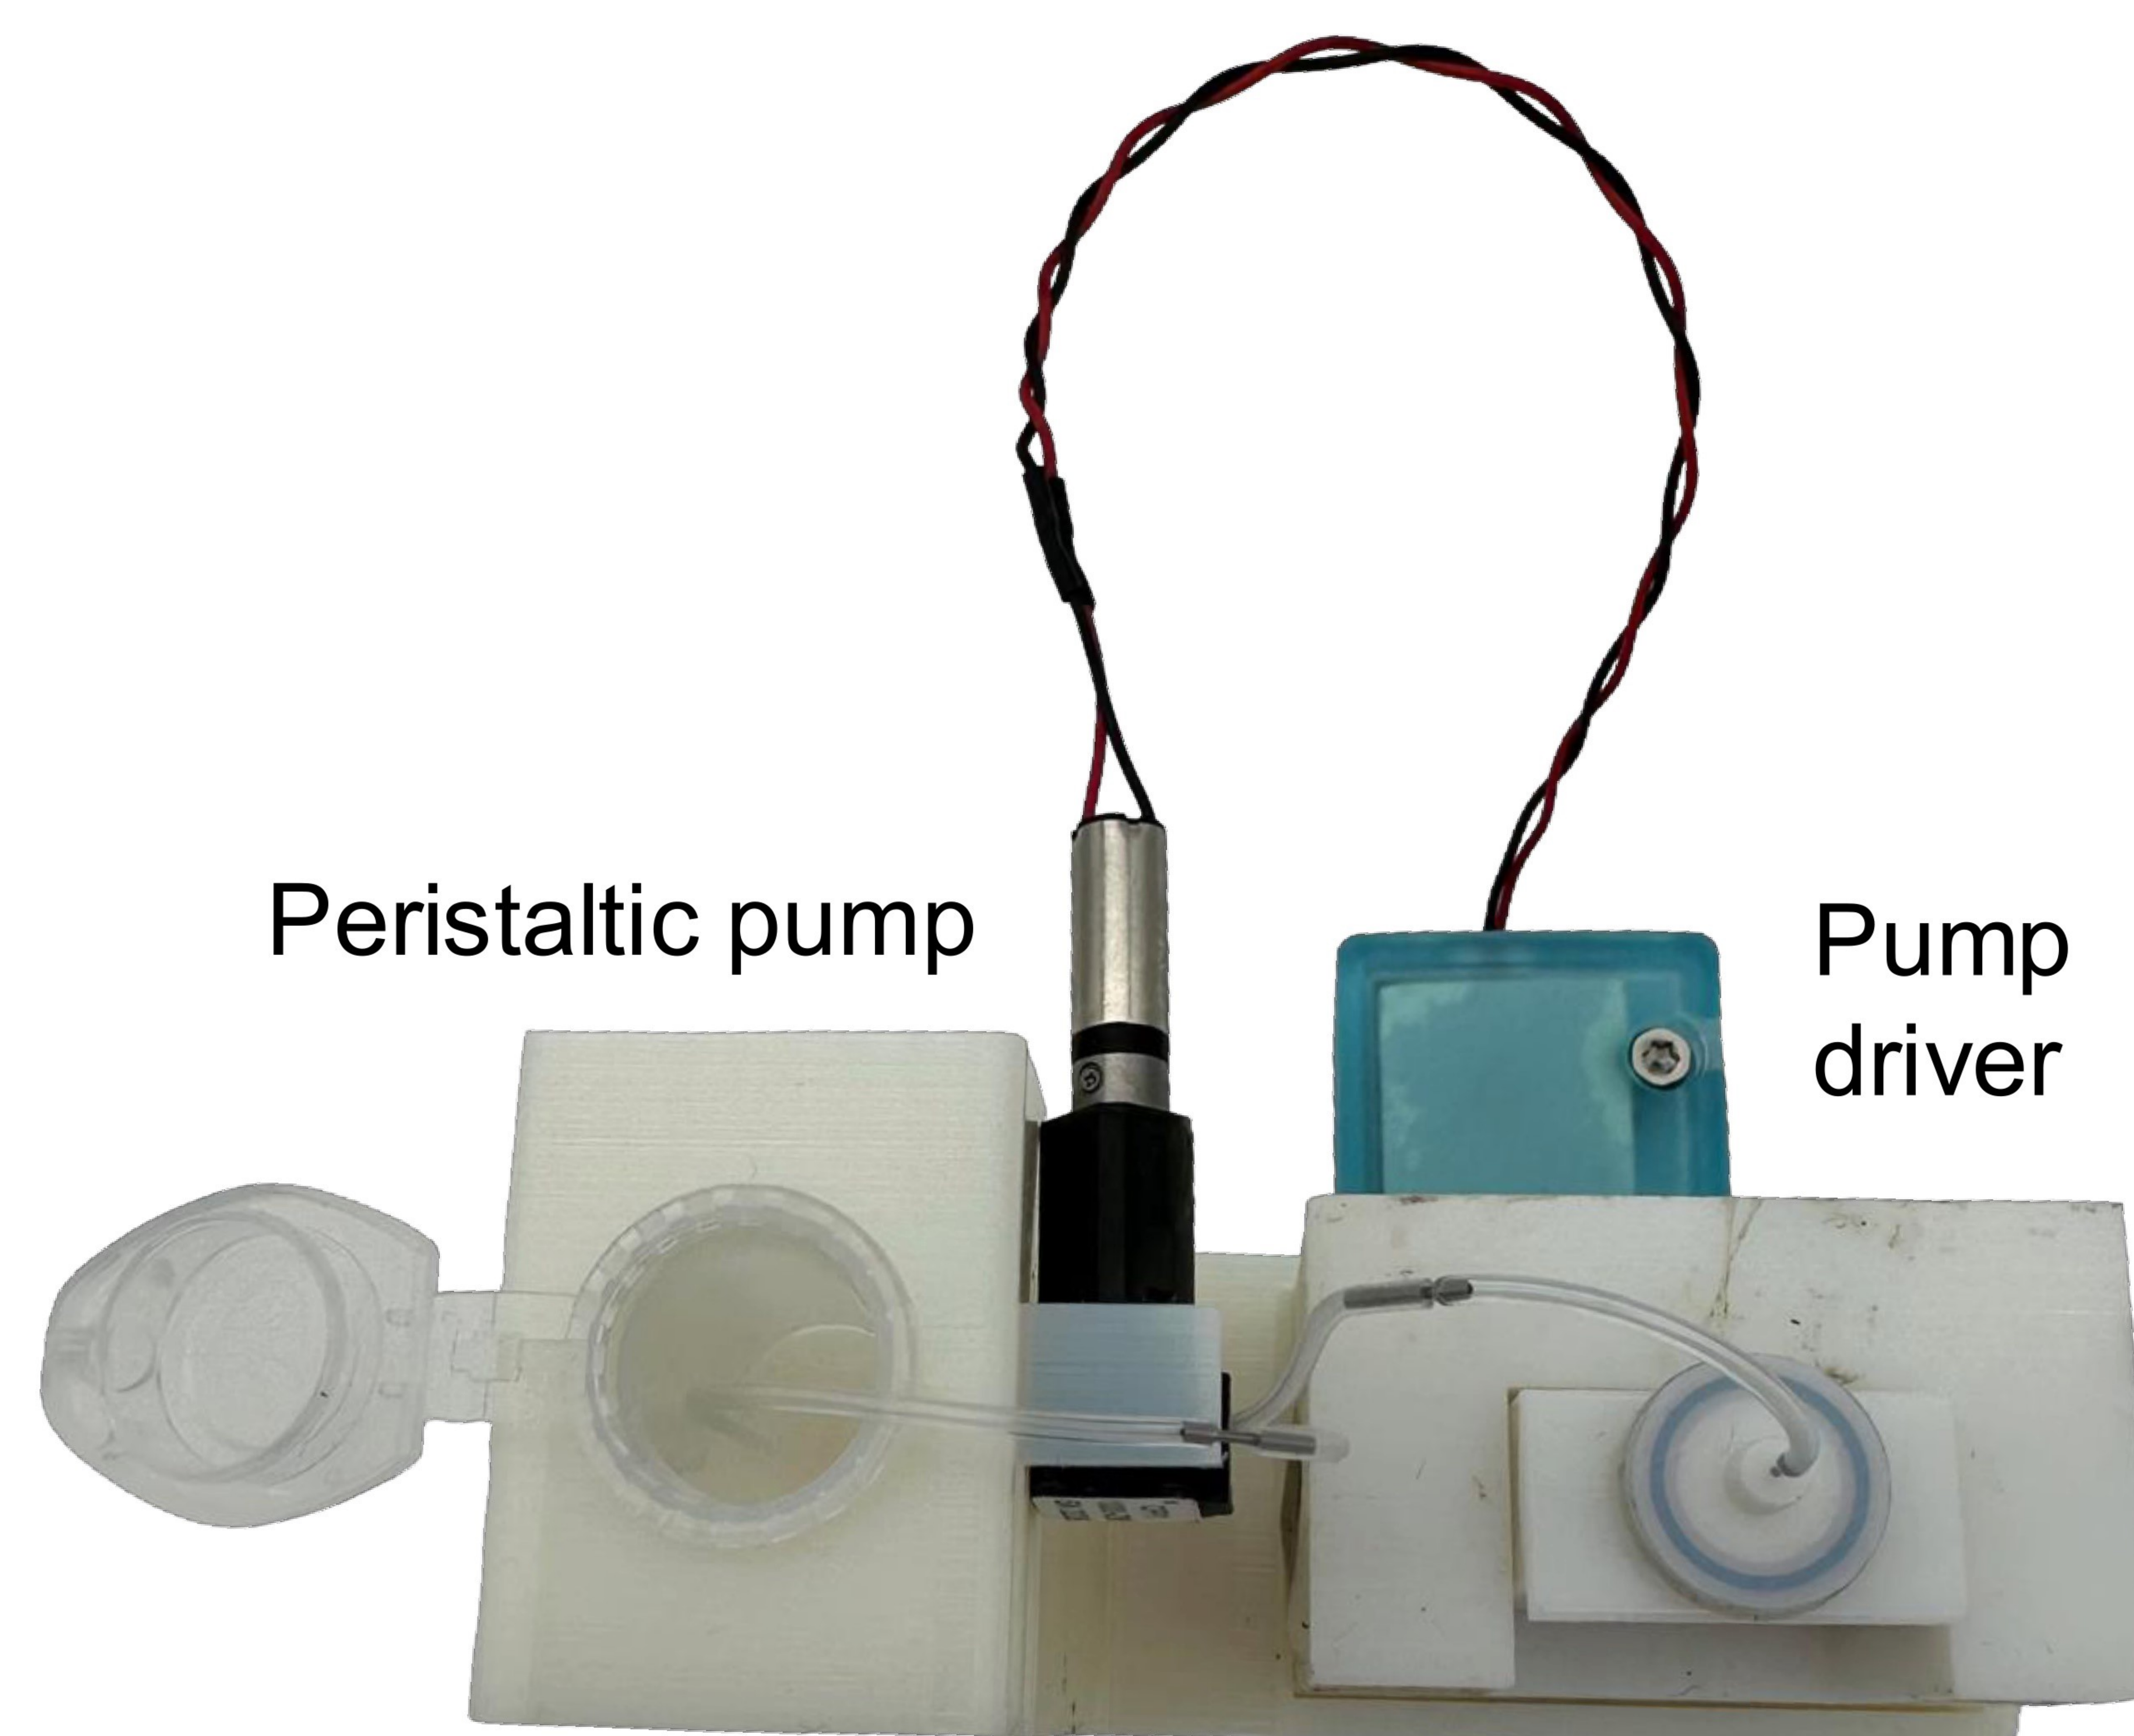

Supplement: d6lc00135a5.pdf [file d6lc00135a5.pdf]
